3 **Anti-microbiota vaccines modulate the tick microbiome in a taxon-specific manner**

4

5 Lourdes Mateos-Hernández<sup>1,†</sup>, Dasiel Obregon<sup>2,†</sup>, Alejandra Wu-Chuang<sup>1</sup>, Jennifer  
6 Maye<sup>3</sup>, Jeremie Bornères<sup>3</sup>, Nicolas Versillé<sup>3</sup>, José de la Fuente<sup>4,5</sup>, Sandra Díaz-  
7 Sánchez<sup>4</sup>, Luis G. Bermúdez-Humarán<sup>6</sup>, Edgar Torres-Maravilla<sup>6</sup>, Agustín Estrada-  
8 Peña<sup>7</sup>, Adnan Hodžić<sup>8</sup>, Ladislav Šimo<sup>1</sup>, Alejandro Cabezas-Cruz<sup>1,\*</sup>

9

10 <sup>1</sup> Anses, INRAE, Ecole Nationale Vétérinaire d'Alfort, UMR BIPAR, Laboratoire de  
11 Santé Animale, Maisons-Alfort, F-94700, France

12 <sup>2</sup> School of Environmental Sciences University of Guelph, Guelph, Ontario, Canada.

13 <sup>3</sup> SEPPIC Paris La Défense, La Garenne Colombes, 92250, France

14 <sup>4</sup> SaBio, Instituto de Investigación en Recursos Cinegéticos (IREC-CSIC-UCLM-  
15 JCCM), Ronda de Toledo s/n, 13005 Ciudad Real, Spain

16 <sup>5</sup> Department of Veterinary Pathobiology, Center for Veterinary Health Sciences,  
17 Oklahoma State University, Stillwater, OK 74078, USA

18 <sup>6</sup> Université Paris-Saclay, INRAE, AgroParisTech, Micalis Institute, 78350, Jouy-en-  
19 Josas, France

20 <sup>7</sup> Faculty of Veterinary Medicine, University of Zaragoza, Spain

21 <sup>8</sup> Institute of Parasitology, Department of Pathobiology, University of Veterinary  
22 Medicine Vienna, Veterinaerplatz 1, 1210 Vienna, Austria

23

24 † These authors contributed equally to this work

25

26 \* Correspondence: [alejandro.cabezas@vet-alfort.fr](mailto:alejandro.cabezas@vet-alfort.fr) (A. Cabezas-Cruz)

## 27 **Abstract**

28           Anti-tick microbiota vaccines have been shown to impact tick feeding but its  
29 specificity has not been demonstrated. In this study we aimed to investigate the impact  
30 of immune targeting of keystone microbiota bacteria on tick performance, and tick  
31 microbiota structure and function. Vaccination against *Escherichia coli*, the selected  
32 keystone taxon, increased tick engorgement weight and reduced bacterial diversity in  
33 *Ixodes ricinus* ticks compared to those that fed on mice immunized against *Leuconostoc*  
34 *mesenteroides*, a non-keystone taxon or mock-immunized group. The abundance of  
35 *Escherichia-Shigella*, but not *Leuconostoc* was significantly reduced in ticks fed on *E.*  
36 *coli*-immunized mice and this reduction was correlated with a significant increase in  
37 host antibodies (Abs) of the isotype IgM and IgG specific to *E. coli* proteins. This  
38 negative correlation was not observed between the abundance of *Leuconostoc* in ticks  
39 and anti-*L. mesenteroides* Abs in mice. We also demonstrated by co-occurrence  
40 network analysis, that immunization against the keystone bacterium restructure the  
41 hierarchy of the microbial community in ticks and that anti-tick microbiota vaccines  
42 reduced the resistance of networks to directed removal of taxa. Functional pathways  
43 analysis showed that immunization with a live bacterial vaccine can also induce taxon-  
44 specific changes in the abundance of pathways. Our results demonstrated that anti-tick  
45 microbiota vaccines can modulate the tick microbiome and that the modification is  
46 specific to the taxon chosen for host immunization. These results guide interventions for  
47 the control of tick infestations and pathogen infection/transmission.

48

49 **Keywords:** Anti-microbiota vaccines, tick, microbiome modulation

50

## 51 **Introduction**

52           Ticks, like all multicellular eukaryotes, harbor a very diverse group of  
53 commensal, symbiotic, and pathogenic microorganisms that collectively comprise the  
54 microbiome (1,2). The complex microbial system and ticks share an intimate  
55 relationship and this symbiotic association has developed into an essential evolutionary  
56 outcome important for tick development, nutritional adaptation, reproductive fitness,  
57 ecological plasticity, and immunity (3-6). There is accumulating evidence that non-  
58 pathogenic midgut bacteria may also affect tick vector competence and susceptibility to  
59 pathogens transmitted by ticks (7-10). The development of high-throughput sequencing

60 technologies and bioinformatics tools in the last decade has significantly improved our  
61 knowledge of the phylogenetic and genetic diversity, dynamics, and ecology of the  
62 microbial communities in several tick species (2). However, the vast majority of studies  
63 of the tick microbiome are restricted to the taxonomic composition, while the functional  
64 significance of bacterial community structure and diversity remains largely unexplored  
65 (11).

66         Recent functional metagenomics studies have shown that exploring the  
67 taxonomic composition and variability of the tick microbiome underestimates the  
68 multidimensional nature of the tick hologenome and that interferences solely based on  
69 taxonomic profiles lack biological significance (11-14). Generally, the native tick  
70 microbiome is likely composed of bacteria, archaea, fungi, protozoans and viruses with  
71 diverse metabolic capacities, which are engaged in a complex network of cooperative  
72 and competitive interactions (1,2). Some of these microorganisms, known as keystone  
73 species, co-occur with many others and may have a large regulatory effect on the  
74 structure, organization, and function of the tick microbiome. The ubiquitousness of the  
75 keystone taxa is likely associated with important resources they provide to the overall  
76 microbial community and/or the tick host (11,12,14). This suggests that keystones are  
77 an essential component of the functional networks and therefore represent ideal targets  
78 for the rational manipulation of the microbial composition and function. The functional  
79 capacity of the tick microbiome is not equal to the overall number of its individual  
80 components, as microbial species strongly and frequently interact with one another and  
81 form a complex functional network (14), which can thus be considered as a fundamental  
82 unit in microbial communities of ticks. Therefore, the microbial co-occurrence network  
83 represents a useful approach to identify the keystone-ness of taxa and the potential  
84 interactions within the functional networks (15,16). Understanding these microbe-  
85 microbe relationships is a critical step for predicting their holistic consequences on tick  
86 performance, physiology, and vector competence (13,14,16). In this sense, a recent  
87 study by Mateos-Hernández et al., (2020) demonstrated that disturbing the *Ixodes*  
88 *ricinus* microbiome stability by selective immune targeting of ubiquitous and abundant  
89 keystone bacteria disrupts the tick-microbiome homeostasis and results in increased  
90 mortality of ticks during feeding. This observation concurred with a wide distribution of  
91 genes encoding  $\alpha$ 1,3-galactosyltransferases ( $\alpha$ 1,3GT) in the *I. ricinus* microbiota and  
92 the host's immune response to  $\alpha$ -Gal. Furthermore, immunization with live *Escherichia*

93 *coli* significantly reduces the relative abundance of Enterobacteriaceae in adult ticks. In  
94 this study, we aimed to investigate whether host antibodies (Abs) targeting keystone  
95 bacteria could impact the taxonomic and functional profiles of the tick microbiome as  
96 well as the structure of the microbial community associated with ticks. Our findings  
97 showed for the first time that host immunization with keystone bacteria is a promising  
98 tool for experimental manipulation of the tick microbiome composition and activity,  
99 and has the potential to reveal other functional mechanisms of the tick-microbiota  
100 interactions and could spur new strategies to control ticks and tick-borne pathogens.

101

## 102 **Materials and Methods**

### 103 **Ethics statement**

104 All procedures were performed at the Animal Facility of the Laboratory for  
105 Animal Health of the French Agency for Food, Environmental and Occupational Health  
106 & Safety (ANSES), Maisons-Alfort, France, according to French and International  
107 Guiding Principles for Biomedical Research Involving Animals (2012). The procedures  
108 were reviewed and approved by the Ethics Committee (ComEth, Anses/ENVA/UPEC),  
109 with permit number E 94 046 08.

110

### 111 **Mice and housing conditions**

112 Six-week-old C57BL/6 (Charles River strain code 027) mice were purchased  
113 from Charles River (Miserey, France) and maintained in Green line ventilated racks  
114 (Tecniplast, Hohenpeissenberg, Germany) at -20 Pa, with food (Kliba nafaj,  
115 Rinaustrasse, Switzerland) and water *ad libitum*. The mice were kept at controlled room  
116 temperature (RT, 20-23°C) and a 12-hour (h) light: 12-h dark photoperiod regimen. The  
117 animals were monitored twice a day by experienced technicians and deviations from  
118 normal behaviors or signs of health deterioration were recorded, and reported.

119

### 120 **Bacteria cultures and live bacteria immunization**

121 Representative bacteria of the genera *Escherichia-Shigella* (i.e., *E. coli*) and  
122 *Leuconostoc* (i.e., *L. mesenteroides*) were selected to be included in live bacteria  
123 vaccine formulations, aiming to test the impact of host immune response against  
124 “keystone” bacteria on tick microbiota composition, stability and functionality, and tick  
125 performance. The selection of these bacteria as live vaccines was based on our previous

126 results (16) that show that the family Enterobacteriaceae was among the top keystone  
127 taxa (i.e, high relative abundance, ubiquitousness, and eigencentality) identified in  
128 *Ixodes* microbiota. Based on the previous results (16), we selected the family  
129 Leuconostocaceae as non-keystone bacteria with low “Keystoneness” (i.e, low relative  
130 abundance, ubiquitousness, and eigencentality) in the microbiome of *Ixodes*.

131 The gram-negative bacterium *E. coli* BL21 (DE3, Invitrogen, Carlsbad, CA,  
132 USA) was prepared as previously described (16). Briefly, *E. coli* was grown on Luria  
133 Broth (LB, Sigma-Aldrich, St. Louis, MO, USA) at 37°C under vigorous agitation,  
134 washed with phosphate buffer saline (PBS) 10 mM NaH<sub>2</sub>PO<sub>4</sub>, 2.68 mM KCl, 140 mM  
135 NaCl, pH 7.2 (Thermo Scientific, Waltham, MA, USA), resuspended at  $3.6 \times$   
136  $10^4$  colony-forming unit (CFU)/mL, and homogenized using a glass homogenizer. The  
137 gram-positive bacterium *Leuconostoc mesenteroides* (strain LBH1148, INRAE  
138 collection) was grown on MRS broth (Difco, Bordeaux, France) at 37°C without  
139 agitation and resuspended and homogenized following the same procedures as for *E.*  
140 *coli*. Six-week-old, C57BL/6 mice were immunized subcutaneously with either *E.*  
141 *coli* ( $n = 4$ ,  $1 \times 10^6$  CFU per mouse) or *L. mesenteroides* ( $n = 4$ ,  $1 \times 10^6$  CFU per  
142 mouse) in a water-in-oil emulsion containing 70% Montanide™ ISA 71 VG adjuvant  
143 (Seppic, Paris, France), with a booster dose two weeks after the first dose. Control,  
144 C57BL/6 ( $n = 4$ ) mice received a mock vaccine containing PBS and adjuvant.

145

#### 146 **Bacterial protein extraction**

147 *Escherichia coli* and *L. mesenteroides* were washed twice with PBS, centrifuged at  
148  $1000 \times g$  for 5 min at 4 °C, resuspended in 1% Trion-PBS lysis buffer (Sigma-Aldrich,  
149 St. Louis, MO, USA) and homogenized with 20 strokes using a glass balls  
150 homogenizer. The homogenate was then centrifuged at  $300 \times g$  for 5 min at 4 °C and the  
151 supernatant was collected. Protein concentration was determined using the Bradford  
152 Protein Assay (Thermo Scientific, San Jose, CA, USA) with Bovine Serum Albumin  
153 (BSA) as standard.

154

#### 155 **Indirect ELISA**

156 The levels of Abs reactive against bacterial proteins were measured in mice sera  
157 as previously reported (16). The 96-well ELISA plates (Thermo Scientific, Waltham,  
158 MA, USA) were coated with 0.5 µg/mL (100 µL/well) of *E. coli* or *L. mesenteroides*  
159 protein extracts and incubated for 2 h with 100 rpm shaking at RT. Subsequently, plates

160 were incubated overnight at 4 °C. The antigens were diluted in carbonate/bicarbonate  
161 buffer (0.05 M, pH 9.6) and incubated overnight at 4 °C. Wells were washed three times  
162 with 100 µL of PBS containing 0.05% (vol/vol) Tween 20 (PBST), and then blocked by  
163 adding 100 µL of 1% Human Serum Albumin (HSA)/PBS for 1 h at RT and 100 rpm  
164 shaking. After three washes, sera samples, diluted 1:50 in 0.5% HSA/PBS, were added  
165 to the wells and incubated for 1 h at 37 °C with shaking. The plates were washed three  
166 times and HRP-conjugated Abs (goat anti-mice IgG and IgM) (Sigma-Aldrich, St.  
167 Louis, MO, USA) were added at 1:1500 dilution in 0.5% HSA/PBST (100 µL/well) and  
168 incubated for 1 h at RT with shaking. The plates were washed three times and the  
169 reaction was developed with 100 µL ready-to-use TMB solution (Promega, Madison,  
170 WI, USA) at RT for 20 min in the dark, and then stopped with 50 µL of 0.5 M H<sub>2</sub>SO<sub>4</sub>.  
171 Optimal antigen concentration and dilutions of sera and conjugate were defined using a  
172 titration assay. The optical density (OD) was measured at 450 nm using an ELISA plate  
173 reader (Filter-Max F5, Molecular Devices, San Jose, CA, USA). All samples were  
174 tested in triplicate and the average value of three blanks (no Abs) was subtracted from  
175 the reads. The cut-off was determined as two times the mean OD value of the blank  
176 controls.

177

## 178 **Immunofluorescence**

179 *Escherichia coli* and *L. mesenteroides* were washed three times with PBS,  
180 centrifuged at 1000x g for 5 min, fixed with 4% paraformaldehyde for 30 min and  
181 blocked with 1% human serum albumin (HSA, w/v in PBS) for 1h at RT. Bacterial cells  
182 were then incubated for two days at 4°C with pooled sera (from all vaccinated mice, day  
183 30) of mice immunized either against *E. coli*, *L. mesenteroides* or the mock vaccine at a  
184 dilution of 1:20 (v/v in PBS). Thereafter, bacteria were washed three times with PBS  
185 followed by incubation with Alexa Fluor 488 conjugates anti-mouse antibody against  
186 IgM (Life technologies, Eugene, OR, USA; A21042) and IgG (Life technologies,  
187 Eugene, OR, USA; A11029) at a dilution of 1:1000 (v/v in 1% HSA) for 3h at RT.  
188 After washing with PBS, bacteria were stained with 2µg/µL of 4',6-diamidino-2-  
189 phenylindole (DAPI) and mounted in ProLong Diamond Antifade (Life Technologies,  
190 Eugene, OR, USA; P36961). Image acquisition was performed using a Leica confocal  
191 microscope (Leica, Wetzlar, Germany) with 63X oil immersion objective.  
192 Representative pictures were assembled in Adobe Illustrator and fluorescence was

193 slightly enhanced using Adobe Photoshop CS6 (Adobe System Incorporated, California,  
194 USA).

195

### 196 **Tick infestation**

197 Unfed nymphs were obtained from the colonies of UMR-BIPAR, Maisons-  
198 Alfort, France. Each mouse was infested with twenty *I. ricinus* nymphs on study day 40.  
199 Ticks were placed within EVA-foam (Cosplay Shop, Brugge, Belgium) capsules glued  
200 on the back of the animals as previously described (17). Unfed and fully-engorged  
201 nymphs were used for DNA extraction.

202

### 203 **DNA Extraction and 16S rRNA sequencing**

204 Before DNA extraction, nymphs were washed two times in miliQ sterile water  
205 and one time in 70% ethanol. Ticks were pooled (5 ticks per pool) and crushed with  
206 glass beads using a Precellys24 Dual homogenizer (Bertin Technologies, Paris, France)  
207 at 5500× g for 20 s. Genomic DNA was extracted using a Nucleospin tissue DNA  
208 extraction Kit (Macherey-Nagel, Hoerd, France). Each DNA sample was eluted in 100  
209 µl of sterile water and DNA sequencing was commissioned to Novogene facility  
210 (London, UK) for amplicon sequencing of the bacterial 16S rRNA gene. A single lane  
211 of Illumina MiSeq system was used to generate 251-base paired-end reads from the V4  
212 variable region of the 16S gene using barcoded universal primers (515F/806R). The raw  
213 16S rRNA sequences were deposited at the SRA repository (Bioproject No.  
214 PRJNA725498, SRA accession No. SUB9549819). Four extraction reagent controls  
215 were set in which the different DNA extraction steps were performed under the same  
216 conditions as for the samples, but using water as template. DNA amplification was then  
217 performed on the extraction control in the same conditions as for any other sample.

218

### 219 **16S rRNA sequences processing**

220 The analysis of 16S rRNA sequences was performed using QIIME 2 pipeline (v.  
221 2019.1) (18). The sequences in the fastq files were denoised and merged using the  
222 DADA2 software (19) as implemented in QIIME 2. The amplicon sequence variants  
223 (ASVs) were aligned with q2-alignment of MAFFT (20) and used to construct a  
224 phylogeny with q2-phylogeny of FastTree 2 (21). Taxonomy was assigned to ASVs  
225 using a classify-sklearn naïve Bayes taxonomic classifier (22) based on SILVA database  
226 (release 132) (23). Only the target sequence fragments were used in the classifier (i.e.,



227 classifier trained with the primers) (24,25). Taxa that persisted across serial fractions of  
228 the samples using QIIME 2 plugin feature-table (core-features) were considered  
229 ubiquitous (18).

230

### 231 **Bacterial co-occurrence networks, identification of keystone taxa and attack** 232 **tolerance test**

233 Co-occurrence networks were inferred for each dataset, based on taxonomic  
234 profiles, collapsed at the genus level. Correlation matrices were calculated using the  
235 SparCC method (26), implemented in the R environment. The topological parameters,  
236 i.e., the number of nodes and edges, weighted degree, centrality metrics and the hub-  
237 score of each node, the diameter of the network, modularity, and clustering coefficient  
238 were calculated for each network. Network calculations and visualizations were  
239 prepared with the software Gephi 0.9.2 (27). Three criteria were used to identify  
240 keystone nodes within the networks as previously described (16): (i) high eigenvector  
241 centrality values, (ii) ubiquitousness, and (iii) the combination of high relative  
242 abundance and eigenvector centrality values. The resistance of these taxonomic  
243 networks to taxa removal (i.e., attack tolerance) was tested on these taxonomic  
244 networks. The purpose was to measure their resistance to the systematic removal of  
245 nodes, either by a random attack with 100 iterations, or by a directed attack, removing  
246 the nodes according to its value of betweenness centrality (the highest, the first). The  
247 analysis of the network resistance was done with the package NetSwan for R (28).

248

### 249 **Prediction of functional traits in the tick microbiome**

250 The 16S rRNA amplicon sequences from each data set were used to predict the  
251 metabolic profiling of each sample. PICRUSt2 (29) was used to predict the  
252 metagenomes from 16S rRNA amplicon sequences. Briefly, the AVSs were placed into  
253 a reference tree (NSTI cut-off value of 2) contained 20,000 full 16S rRNA sequences  
254 from prokaryotic genomes, which is then used to predict individual gene family copy  
255 numbers for each AVS. The predictions are based on Kyoto Encyclopedia of Genes and  
256 Genomes (KEGG) orthologs (KO) (30). The output of these analyses included pathways  
257 and EC (Enzyme Commission number) profiling; the pathways were constructed based  
258 on the MetaCyc database (31)

259

### 260 **Statistical analysis**



261 Differences in relative antibody levels (i.e., OD) between groups of immunized  
262 mice in the different time points were compared using two-way ANOVA with  
263 Bonferroni multiple comparison tests applied for individual comparisons. Microbial  
264 diversity analyses were carried out on rarefied ASV tables, calculated using the q2-  
265 diversity plugins. The alpha diversity (richness and evenness) was explored using  
266 Faith's phylogenetic alpha diversity index (32) and Pielou's evenness index (33).  
267 Differences in  $\alpha$ -diversity metric between groups were assessed using Kruskal-Wallis  
268 test ( $\alpha=0.05$ ). Bacterial  $\beta$ -diversity was assessed using the Bray Curtis dissimilarity  
269 (34), and compared between groups using the PERMANOVA test. The differential  
270 abundant taxa and functional feature (KO genes and pathways) were explored between  
271 bacteria- and PBS-immunized mice, the differential features were detected by  
272 comparing the log<sub>2</sub> fold change (LFC) using the Wald test as implemented in the  
273 compositional data analysis method DESeq2 (35).

274 Correlations between tick microbiota bacteria abundance and mice Abs levels  
275 were calculated with the ANOVA-Like Differential Expression (ALDEx2, v. 1.22.0)  
276 correlation analysis (aldex.cor function) as implemented in R (v. 4.0.3). Unpaired non-  
277 parametric Mann-Whitney U test was used to compare the tick parameters (i.e., time to  
278 complete feeding, the weight of engorged ticks and tick mortality) between groups.  
279 Two-way ANOVA and Mann-Whitney U test analyses were performed in the GraphPad  
280 5 Prism software (GraphPad Software Inc., San Diego, CA, USA). Differences were  
281 considered significant when  $p < 0.05$ .

282

## 283 **Results**

### 284 **Vaccination with keystone bacteria induces increased engorgement and reduced** 285 **bacterial diversity in *Ixodes ricinus***

286 No mortality or adverse events were observed in mice immunized with *E. coli* or  
287 *L. mesenteroides*. Following the immunization protocol, each mouse was infested with  
288 20 *I. ricinus* nymphs. Time to complete feeding, the weight of engorged ticks and tick  
289 mortality were recorded and compared between immunized and control groups. A  
290 significant increase (Mann-Whitney U test,  $p = 0.03$ ) in weight was recorded in nymphs  
291 that fed on *E. coli*-immunized mice compared with the mice of the control group  
292 (Figure 1A). This was not the case for ticks engorged on *L. mesenteroides*-immunized  
293 mice (Mann-Whitney U test,  $p > 0.05$ ). There were no significant differences (Mann-  
294 Whitney U test,  $p > 0.05$ ) in the total number of ticks that dropped naturally (Figure 1B)

295 or mortality of ticks that fed on *E. coli*-immunized, *L. mesenteroides*-immunized, or  
296 control mock-immunized mice (Figure 1C).

297 The impact of anti-microbiota vaccines on the diversity, composition and  
298 abundance of tick microbiota bacteria was assessed after 16S rRNA amplicon  
299 sequencing of DNA extracted from unfed *I. ricinus* nymphs or after engorgement on *E.*  
300 *coli*-immunized, *L. mesenteroides*-immunized, or mock-immunized mice. Vaccination  
301 with the keystone bacterium *E. coli* decreased the bacterial diversity associated with the  
302 tick microbiota ( $H = 8.6$ ,  $p = 0.03$ , Figure 2A), but had no significant impact ( $H = 5.8$ ;  $p$   
303  $= 0.12$ ) on the species evenness (Figure 2B). Conversely, vaccination with the non-  
304 keystone bacterium *L. mesenteroides* had no impact on bacterial diversity (Figure 2A),  
305 but decreased significantly the species evenness, compared to unfed nymph (Figure 2B).  
306 Overall, the comparison of the diversity indexes of unfed and fed ticks revealed that  
307 anti-microbiota vaccination interferes with the normal dynamics of tick microbiota,  
308 regardless of the keystone-ness of the bacteria used in the vaccine formulation.  
309 Accordingly, a Principal Coordinates Analysis (PCoA) shows that the profiles of both  
310 groups of ticks that fed on bacteria-immunized mice are very similar compared to  
311 mock-immunized or unfed ticks ( $F = 5.30$ ;  $p = 0.00$ , Figure 2C).

312

### 313 **Increase of bacteria-specific Abs was associated with reduced abundance of the** 314 **keystone taxon *Escherichia-Shigella***

315 Taxa composition and abundance analysis showed significant changes in the  
316 abundance of several bacterial genera in ticks collected from mock-immunized mice  
317 compared with unfed ticks (Figure 3A). There were significant changes in taxa  
318 abundance in the ticks engorged on either *L. mesenteroides*-immunized (Figure 3B), or  
319 *E. coli*-immunized (Figure 3C) mice compared to the mock-immunized group. The taxa  
320 with significant changes in abundance, measured as centered log ratio (clr), are  
321 displayed in figures 3D and 3E for *L. mesenteroides*-immunized and *E. coli*-immunized  
322 mice, respectively. Notably, the abundance of *Escherichia-Shigella*, but not of  
323 *Leuconostoc*, was significantly reduced in ticks that fed on *E. coli*-immunized mice  
324 compared with the control group (Figure 3E). In contrast, the abundance of *Escherichia-*  
325 *Shigella* or *Leuconostoc* was not significantly affected in ticks that fed on *L.*  
326 *mesenteroides*-immunized mice (Figure 3D).

327 Immunization with live *E. coli* induced a significant increase in IgM and IgG  
328 specific to *E. coli* proteins (Figure 4A). Strong and specific immune reaction of mice

329 IgM against *E. coli* on d30 was confirmed by immunofluorescence (Supplementary  
330 Figure S1A). The reaction of anti-*E. coli* IgG from *E. coli*-immunized mice against *E.*  
331 *coli* was also confirmed by immunofluorescence (Supplementary Figure S1B).  
332 However, immunization with live *L. mesenteroides* elicited only marginal levels of IgM  
333 on d30 that dropped by d46 (Figure 4B), suggesting that in contrast to *E. coli*, *L.*  
334 *mesenteroides* is poorly immunogenic as a live vaccine. Consistent with the low IgM  
335 levels raised against the bacterium *L. mesenteroides* on d30 (Figure 4B), we observed a  
336 modest recognition of *L. mesenteroides* by mice IgM immunized with the gram-  
337 negative bacteria (Supplementary Figure S1C). No reaction was observed for when anti-  
338 *L. mesenteroides* IgG detection was used (Supplementary Figure S1D), which is  
339 consistent with the low levels of anti-*L. mesenteroides* IgG detected by ELISA (Figure  
340 4B).

341 No significant cross-reaction to *E. coli* proteins was detected in the IgM and IgG  
342 fractions of the sera of mice immunized with the live vaccine containing *L.*  
343 *mesenteroides*. A weak increase in anti-*E. coli* IgM on d30 and d46, and no increase in  
344 anti-*E. coli* IgG were observed in *L. mesenteroides*-immunized mice (Supplementary  
345 Figure S2A). However, anti-*L. mesenteroides* IgG increased on d46, and IgM specific to  
346 proteins of this bacterium increased in response to *E. coli* vaccination (Supplementary  
347 Figure S2B).

348 To test a possible association between the increase in *E. coli*-specific IgM and  
349 IgG after vaccination and the decrease in the abundance of *Escherichia-Shigella*, we  
350 performed an ALDEx2 correlation analysis between the abundance of all bacterial taxa  
351 at genus level and Abs levels. Significant negative correlations were found between the  
352 levels of anti-*E. coli* IgM ( $r_s = -0.60$ ,  $p = 0.01$ ) and IgG ( $r_s = -0.57$ ,  $p = 0.02$ ) in mice  
353 sera and the abundance of *Escherichia-Shigella* in the ticks. A negative correlation was  
354 also found between anti-*E. coli* IgM ( $r_s = -0.57$ ,  $p = 0.02$ ) and IgG ( $r_s = -0.64$ ,  $p = 0.01$ )  
355 levels and one bacteria genus (0.18%, total 533 taxa), *Parabacteroides*, family  
356 Porphyromonadaceae. A positive correlation was found between the genus *Lawsonella*,  
357 Order Corynebacteriales, and anti-*E. coli* IgM ( $r_s = 0.65$ ,  $p = 0.01$ ) and IgG ( $r_s = 0.68$ ,  $p$   
358  $= 0.008$ ) levels. No taxa abundance was found to correlate with the levels of both anti-  
359 *E. coli* IgM and IgG in the *L. mesenteroides*-immunized mice. In addition, no  
360 statistically significant correlations were found between the anti-*L. mesenteroides* IgM  
361 and IgG levels and the abundance of *Leuconostoc*, or any other taxa identified in the  
362 tick microbiome. Taken together, these results showed that anti-*E. coli* immunization of

363 mice reduces the *Escherichia-Shigella* abundance within the tick microbiome in a  
364 taxon-specific manner.

365

### 366 **Anti-tick microbiota vaccine reshapes the hierarchy of nodes in co-occurrence** 367 **networks**

368 The taxonomic profiles generated were used to build a co-occurrence network  
369 and the eigenvector centrality values were computed for each node. Bacteria with a high  
370 eigenvector centrality value ( $> 0.90$ ) were considered as keystone bacteria in the  
371 microbiota of *I. ricinus*. The impact of live bacteria immunization on the structure of the  
372 tick microbial communities was then quantified and visualized using co-occurrence  
373 networks. In accordance with their classification as non-keystone and keystone taxa in  
374 the networks of ticks that fed on mock-immunized mice (Supplementary Figure S3A),  
375 *Leuconostoc* and *Escherichia-Shigella* were poorly (Figure 5A) and highly (Figure 5B)  
376 interconnected to other taxa, respectively. Visual inspection of local connectedness  
377 around *Leuconostoc* and *Escherichia-Shigella* reveals that tick feeding on mice  
378 immunized with these bacteria exhibited an increase (Figure 5C) and decrease (Figure  
379 5D) in the number of co-occurring taxa. Notably, the eigenvector centrality value of  
380 *Leuconostoc* was very similar in the networks inferred from ticks fed on *L.*  
381 *mesenteroides*-immunized (eigenvector 0.11) and mock-immunized (eigenvector 0.12)  
382 mice, while the eigenvector value of *Escherichia-Shigella* decreased 95 times in the  
383 network of ticks fed on *E. coli*-immunized (eigenvector 0.01) compared with those fed  
384 on mock-immunized mice (eigenvector 0.95). Visual (Supplementary Figure S3) and  
385 numerical (Table 1) comparison of network parameters show that, in addition to the  
386 local connectedness effect, anti-microbiota vaccination had a large impact on the  
387 structure of the microbial community of ticks. For instance, the number of edges  
388 decreased in the co-occurring networks of ticks that fed on *E. coli*-immunized compared  
389 to the control group (Table 1) and increased in the networks of ticks that fed on *L.*  
390 *mesenteroides*-immunized mice.

391 Taxonomic networks were tested for attack tolerance. In this analysis, the  
392 resistance of the networks to random or directed, removal of nodes was measured and  
393 the proportion of taxa removal needed to reach a loss in connectivity of 0.90 was  
394 recorded for each network. A proportion of 0.58, 0.55 and 0.66 randomly removed  
395 nodes produce a 0.90 connectivity loss in the networks of ticks from the control (Figure  
396 6A), *E. coli*-immunized (Figure 6B) and *L. mesenteroides*-immunized (Figure 6C) mice,

397 respectively. The same loss in connectivity (i.e., 0.90) was observed when a smaller  
398 proportion (i.e., 0.23 for the control group, 0.14 for *E. coli* group and 0.53 for the *L.*  
399 *mesenteroides* group) of highly central nodes were removed first from each network  
400 (Figure 6). Thus, immune targeting of the keystone taxon *Escherichia-Shigella*  
401 decreased attack tolerance in bacterial co-occurrence network. The random and directed  
402 removal curves within the network of ticks from *L. mesenteroides*-immunized mice  
403 revealed high similarity, which was not the case in the other two networks. This  
404 suggests an unstructured hierarchy of nodes in the co-occurrence network of ticks from  
405 *L. mesenteroides*-immunized mice, and a reshaping in the hierarchy of nodes in the co-  
406 occurrence network of ticks from *E. coli*-immunized mice compared to the control  
407 group.

408

#### 409 **Community disturbance by anti-microbiota vaccine changes the abundance of** 410 **putative metabolic pathways in the tick microbiome**

411 We analyzed microbial putative functions displayed by the microbiome of unfed  
412 ticks and those that fed on *L. mesenteroides*-immunized and *E. coli*-immunized mice by  
413 PICRUST2 and compared them with the bacterial community predicted functions  
414 present in the ticks that fed on mice immunized with the mock vaccine (Figure 7).  
415 Blood feeding on control mice induced fold changes in the relative abundance of several  
416 putative genes (KO) in *I. ricinus* microbiome compared to unfed ticks (Figure 7A).  
417 Major changes in the predicted gene profiles were also observed in the microbiome of  
418 tick from *L. mesenteroides*-immunized (Figure 7B) and *E. coli*-immunized (Figure 7C)  
419 mice. Putative pathway analysis revealed that some of the functional pathways were  
420 conserved and others were specific to each group (Figure 8), when considering those  
421 with significant log2fold change above 1 in their abundance (Figure 7A). A total of 115  
422 pathways had differential abundance (81 and 34 with decreased and increased  
423 abundance, respectively, Log2fold change > 1,  $p < 0.05$ ) in the ticks that fed on mock-  
424 immunized mice compared to unfed ticks (Supplementary Table S1). Thirteen pathways  
425 had a log2fold change lower than -1 in the functional prediction of the microbiome of  
426 ticks fed on *L. mesenteroides*-immunized mice, compared to the control group of ticks  
427 fed on mock-immunized mice (Supplementary Table S2). Only one of them,  
428 tetrahydromethanopterin biosynthesis (Log2fold change = -5.5, Kruskal-Wallis test,  $p =$   
429 0.02), changed exclusively in the ticks of the *L. mesenteroides*-immunized group.  
430 Fourteen pathways had a log2fold change lower than -1 in the functional prediction of

431 the microbiome of ticks fed on *E. coli*-immunized mice, compared to the control group  
432 (Supplementary Table S3). A significant decrease in the relative abundance of only the  
433 L-lysine fermentation to acetate and butanoate (Log2fold change = -1.6, Kruskal-Wallis  
434 test,  $p = 0.008$ ) pathway was found exclusively in ticks fed on *E. coli*-immunized mice.  
435 The relative abundance of only a reduced number of pathways (i.e., methanogenesis  
436 from acetate, super pathway of glycerol degradation to 1,3-propanediol, superpathway  
437 of (Kdo)2-lipid A biosynthesis, and CMP-legionamate biosynthesis I) changed  
438 significantly in the three groups of fed ticks and they may represent functional changes  
439 induced by blood feeding in the bacterial communities independent of the treatment.

440

#### 441 **Discussion**

442 Several studies have shown that the tick microbiome is a gate to access tick  
443 physiology and vector competence (1,36). Specifically, a reduced bacterial load has  
444 been associated with decreased reproductive fitness after antibiotics treatment in ticks  
445 (3,36-40). However, considering that antibiotics can target several bacteria  
446 simultaneously, studies using broad-spectrum antimicrobial compounds make  
447 impossible to establish causal links between specific taxa and their role on tick  
448 physiology. Recently, we showed for the first time that anti-tick microbiota vaccines  
449 impact tick performance during feeding (16). Considering that host Abs and  
450 complement acquired during tick feeding not only retain their immune functions, but  
451 also access several tick tissues (40-45), we hypothesized that anti-tick microbiota  
452 vaccines can be used as a precision microbiology tool to target selected taxa in the tick  
453 microbiome. Here we show that immunization with a live *E. coli* vaccine elicited  
454 bacterial-specific Abs of the isotypes IgM and IgG. Furthermore, immune targeting of  
455 the keystone taxon *Escherichia-Shigella* using a live *E. coli* vaccine reduced the relative  
456 abundance of *Escherichia-Shigella* in engorged ticks, suggesting that host Abs can bind  
457 and promote killing bacteria within tick microbiota. Antibodies induced against  
458 particular tick proteins can also react with the corresponding tick protein within tick  
459 tissues (43,46). For example, host Abs against the glycoprotein Bm86, predominantly  
460 located in the membrane of tick gut cells (46), modulate tick proteome (47) and bind to  
461 the surface of epithelial cells in the tick intestine causing cell lysis (43). Therefore, it  
462 can be presumed that when ingested during blood feeding, the Abs produced against  
463 selected tick microbiota bacteria could interfere with the physiological functionality of  
464 microbes within the ticks.



465 Targeting the keystone bacteria *Escherichia-Shigella* with host Abs also reduced  
466 its keystone-ness, which was associated with a global modulation of the microbial  
467 community structure. The resulting community had a reduced alpha diversity, and  
468 changes in the taxonomic and predicted functional profiles. In addition, the co-occurring  
469 networks showed that *Escherichia-Shigella*-depleted communities had fewer nodes and  
470 the connectivity between them was weak and more susceptible to taxa extinction when  
471 compared with the control group of ticks that fed on mock-immunized mice. Removal  
472 of keystone species has strong disturbing effects, resulting in loss of microbiota  
473 biodiversity in different ecological settings (48-51). Depletion of keystone species could  
474 also result in microbial dysbiosis that impairs the integrity of the gut ecosystem, as seen  
475 in vertebrates (52,53). The impact of *E. coli* deletion has been tested experimentally on  
476 a synthetic consortium of 14 gut microbes (53). In particular, removal of *E. coli* resulted  
477 in the highest impact on biomass and growth rates, indicating major roles of this  
478 microorganism on a synthetic microbial consortium (53).

479 The bacterial community of ticks fed on *E. coli*-immunized mice had a  
480 significant decrease in the relative abundance of the predicted pathway L-lysine  
481 fermentation to acetate and butanoate. The relative abundance of other predicted  
482 pathways changed in response to feeding alone or feeding on *L. mesenteroides*-  
483 immunized mice. We consider the changes observed in the microbiome of ticks fed on  
484 *L. mesenteroides*-immunized mice as non-specific, or at least not dependent on a  
485 specific Abs response. This result suggests that bacterial community modulation by  
486 anti-microbiota vaccines could impact the functional profiles associated with the tick  
487 microbiome. Considering that lysine is an essential amino acid and that the tick genome  
488 does not encode for lysine synthesis enzymes (54), we hypothesized that the decrease of  
489 lysine degradation by tick microbiome might result in higher levels of free lysine  
490 available for tick metabolism. This could potentially explain the higher body weight of  
491 ticks fed on *E. coli*-immunized mice compared to mock-immunized and *L.*  
492 *mesenteroides*-immunized mice. The limitation here is that we used pathway prediction  
493 and did not perform metabolomics to test whether the availability of free lysine  
494 increases in the gut of ticks fed on *E. coli*-immunized mice. Further investigation is  
495 needed to examine the metabolite dynamics *in vivo* in response to bacterial community  
496 modulation by anti- *E. coli* IgM and IgG.

497

498 **Conclusions**



499 In this study, we demonstrated that after immunization against the keystone  
500 microbiota taxon *E. coli*, the abundance of *Escherichia-shigella* in the tick microbiome  
501 negatively correlated with the level of host Abs specific to *E. coli* suggesting that anti-  
502 tick microbiota vaccine has the capacity to target a specific taxon through an immune  
503 response. We also showed that tick engorgement, microbiome bacterial diversity and  
504 microbial community structure can be disturbed by vaccination with *E. coli* highlighting  
505 the important role that keystone microbiota bacteria have in tick performance and  
506 microbiome. Specific-taxon changes in enzymes and pathways abundances observed  
507 with live bacteria vaccines suggest that the scope of anti-tick microbiota vaccine is not  
508 limited to the taxonomic modulation level, but it may also regulate the functions  
509 associated with the microbiome. In summary, targeting keystone bacteria of the tick  
510 microbiota by host Abs seems to be a suitable tool for the modulation of tick  
511 microbiome to study the role of a specific taxon in tick physiology. Anti-tick microbiota  
512 vaccine can also be a powerful tool to evaluate the functional contribution of a specific  
513 taxon in tick microbiota on pathogen colonization and transmission. These results guide  
514 precise interventions for the control of tick infestations and pathogen  
515 infection/transmission.

516

### 517 **Acknowledgements**

518 UMR BIPAR is supported by the French Government's Investissement d'Avenir  
519 program, Laboratoire d'Excellence "Integrative Biology of Emerging Infectious  
520 Diseases" (grant no. ANR-10-LABX-62-IBEID). Alejandra Wu-Chuang is supported  
521 by Programa Nacional de Becas de Postgrado en el Exterior "Don Carlos Antonio  
522 López" (grant no. 205/2018).

523

### 524 **Conflict of interest**

525 The authors declare no conflict of interest.

526

### 527 **Author contributions**

528 AC-C, DO, JM and LM-H conceived the study. LM-H, AW-C, JM and JB  
529 performed the experiments and acquired the data. DO, LM-H, SD-S, AE-P and AC-C  
530 analyzed the data. DO, AC-C, AW-C and AE-P prepared figures and supplementary  
531 materials. LGB-H, ET-M, NV and JdlF contributed reagents and other resources. AC-C,

532 LS, LGB-H, and JdlF supervised the work. AC-C, LM-H, AW-C, AH and DO drafted  
533 the first version of the manuscript. All the authors made editorial contributions, revised  
534 and accepted the final version of the manuscript.

535 **References**

536

537 1. Narasimhan S, and Fikrig E. Tick microbiome: the force within. *Trends Parasitol*  
538 (2015) 31:315–23. doi: 10.1016/j.pt.2015.03.010

539 2. Bonnet SI, and Pollet T. Update on the intricate tango between tick microbiomes  
540 and tick-borne pathogens. *Parasite Immunol.* (2020) 13:e12813. doi:  
541 10.1111/pim.12813

542 3. Zhong J, Jasinskas A, and Barbour AG. Antibiotic treatment of the tick vector  
543 *Amblyomma americanum* reduced reproductive fitness. *PLoS One* (2007) 2:e405. doi:  
544 10.1371/journal.pone.0000405.

545 4. Neelakanta G, Sultana H, Fish D, Anderson JF, and Fikrig E. *Anaplasma*  
546 *phagocytophilum* induces *Ixodes scapularis* ticks to express an antifreeze glycoprotein  
547 gene that enhances their survival in the cold. *J Clin Invest* (2010) 120:3179–90. doi:  
548 10.1172/JCI42868

549 5. Bonnet SI, Binetruy F, Hernández-Jarguín AM, and Duron O. The tick  
550 microbiome: Why non-pathogenic microorganisms matter in tick biology and  
551 pathogen transmission. *Front Cell Infect Microbiol* (2017) 7:236. doi:  
552 10.3389/fcimb.2017.00236.

553 6. Duron O, Morel O, Noël V, Buysse M, Binetruy F, Lancelot R, et al. Tick-  
554 bacteria mutualism depends on B vitamin synthesis pathways. *Curr Biol* (2018)  
555 28:1896–1902. doi: 10.1016/j.cub.2018.04.038.

556 7. Narasimhan S, Rajeevan N, Liu L, Zhao YO, Heisig J, Pan J, et al. Gut microbiota  
557 of the tick vector *Ixodes scapularis* modulate colonization of the Lyme disease  
558 spirochete. *Cell Host Microbe* (2014) 15:58–71. doi: 10.1016/j.chom.2013.12.001.

559 8. Narasimhan S, Schuijt TJ, Abraham NM, Rajeevan N, Coumou J, Graham M, et  
560 al. Modulation of the tick gut milieu by a secreted tick protein favors *Borrelia*  
561 *burgdorferi* colonization. *Nat Commun* (2017) 8:184. doi: 10.1038/s41467-017-00208-  
562 0.

563 9. Gall CA, Reif KE, Scoles GA, Mason KL, Mousel M, Noh SM, et al. The  
564 bacterial microbiome of *Dermacentor andersoni* ticks influences pathogen  
565 susceptibility. *ISME J* (2016) 10:1846–55. doi: 10.1038/ismej.2015.266

566 10. Abraham NM, Liu L, Jutras BL, Yadav AK, Narasimhan S, Gopalakrishnan V, et  
567 al. Pathogen-mediated manipulation of arthropod microbiota to promote infection.  
568 *Proc Natl Acad Sci USA* (2017) 114: E781–90. doi: 10.1073/pnas.1613422114.

- 569 11. Obregón D, Bard E, Abrial D, Estrada-Peña A, and Cabezas-Cruz A. Sex-specific  
570 linkages between taxonomic and functional profiles of tick gut microbiomes. *Front*  
571 *Cell Infect Microbiol* (2019) 9:298. doi: 10.3389/fcimb.2019.00298.
- 572 12. Díaz-Sánchez S, Estrada-Peña A, Cabezas-Cruz A, and de la Fuente J.  
573 Evolutionary insights into the tick hologenome. *Trends Parasitol* (2019) 35:725–37.  
574 doi: 10.1016/j.pt.2019.06.014.
- 575 13. Estrada-Peña A, Cabezas-Cruz A, and Obregón D. Behind taxonomic variability:  
576 The functional redundancy in the tick microbiome. *Microorganisms* (2020a) 8:1829.  
577 doi: 10.3390/microorganisms8111829.
- 578 14. Estrada-Peña A, Cabezas-Cruz A, and Obregón D. Resistance of tick gut  
579 microbiome to anti-tick vaccines, pathogen infection and antimicrobial peptides.  
580 *Pathogens* (2020b) 9:309. doi: 10.3390/pathogens9040309.
- 581 15. Poudel R, Jumpponen A, Schlatter DC, Paulitz TC, Gardener BB, Kinkel LL, et  
582 al. Microbiome networks: A systems framework for identifying candidate microbial  
583 assemblages for disease management. *Phytopathology* (2016) 106:1083–96. doi:  
584 10.1094/PHYTO-02-16-0058-FI.
- 585 16. Mateos-Hernández L, Obregón D, Maye J, Borneres J, Versille N, de la Fuente J,  
586 et al. Anti-tick microbiota vaccine impacts *Ixodes ricinus* performance during feeding.  
587 *Vaccines (Basel)* (2020) 8:702. doi: 10.3390/vaccines8040702.
- 588 17. Mateos-Hernández L, Rakotobe S, Defaye B, Cabezas-Cruz A, and Šimo L. A  
589 capsule-cased model for immature hard tick stages infestation on laboratory mice. *J*  
590 *Vis Exp* (2020). doi: 10.3791/61430.
- 591 18. Bolyen E, Rideout JR, Dillon MR, Bokulich NA, Abnet CC, Al-Ghalith GA, et al.  
592 Reproducible, interactive, scalable and extensible microbiome data science using  
593 QIIME 2. *Nat Biotechnol* (2019) 37(8):852-57. doi: 10.1038/s41587-019-0209-9..
- 594 19. Callahan BJ, McMurdie PJ, Rosen MJ, Han AW, Johnson AJ, and Holmes SP.  
595 DADA2: High-resolution sample inference from Illumina amplicon data. *Nat Methods*  
596 (2016) 13(7):581-3. doi: 10.1038/nmeth.3869.
- 597 20. Katoh K, Misawa K, Kuma K, and Miyata T. MAFFT: a novel method for rapid  
598 multiple sequence alignment based on fast Fourier transform. *Nucleic Acids Res*  
599 (2002) 30(14):3059-66. doi: 10.1093/nar/gkf436. PMID: 12136088;
- 600 21. Price MN, Dehal PS, and Arkin AP. FastTree 2--approximately maximum-  
601 likelihood trees for large alignments. *PLoS One* (2010) 5(3):e9490. doi:  
602 10.1371/journal.pone.0009490.

- 603 22. Bokulich NA, Kaehler BD, Rideout JR, Dillon M, Bolyen E, Knight R, et al.  
604 Optimizing taxonomic classification of marker-gene amplicon sequences with QIIME  
605 2's q2-feature-classifier plugin. *Microbiome* (2018) 6(1):90. doi: 10.1186/s40168-018-  
606 0470-z.
- 607 23. Yarza P, Yilmaz P, Pruesse E, Glöckner FO, Ludwig W, Schleifer KH, et al.  
608 Uniting the classification of cultured and uncultured bacteria and archaea using 16S  
609 rRNA gene sequences. *Nat Rev Microbiol* (2014) 12(9):635-45. doi:  
610 10.1038/nrmicro3330.
- 611 24. Werner JJ, Koren O, Hugenholtz P, DeSantis TZ, Walters WA, Caporaso JG, et  
612 al. Impact of training sets on classification of high-throughput bacterial 16s rRNA  
613 gene surveys. *ISME J* (2012) 6(1):94-103. doi: 10.1038/ismej.2011.82.
- 614 25. Ren T, and Wu M. PhyloCore: A phylogenetic approach to identifying core taxa  
615 in microbial communities. *Gene* (2016) 593(2):330-3. doi:  
616 10.1016/j.gene.2016.08.032.
- 617 26. Friedman J, and Alm EJ. Inferring correlation networks from genomic survey  
618 data. *PLoS Comput Biol* (2012) 8(9):e1002687. doi: 10.1371/journal.pcbi.1002687
- 619 27. Bastian M, and Jacomy M. (2009) “Gephi: An open source software for exploring  
620 and manipulating networks”, in Proceedings of the Third International Conference on  
621 Weblogs and Social Media, e.d AAAI Press, (Menlo Park, California), 4-6
- 622 28. Lhomme, S. NetSwan: Network strengths and weaknesses analysis. *R Pack*  
623 *Version* (2015) 1–8.
- 624 29. Douglas GM, Maffei VJ, Zaneveld J, Yurgel NS, Brown JR, Taylor CM et al.  
625 PICRUSt2: An improved and extensible approach for metagenome inference. *BioRxiv*  
626 (2019) 672295. doi:10.1101/672295
- 627 30. Kanehisa M, and Goto S. KEGG: kyoto encyclopedia of genes and genomes.  
628 *Nucleic Acids Res* (2000) 28(1):27-30. doi: 10.1093/nar/28.1.27.
- 629 31. Caspi R, Billington R, Fulcher CA, Keseler IM, Kothari A, Krummenacker M , et  
630 al. The MetaCyc database of metabolic pathways and enzymes. *Nucleic Acids Res*  
631 (2018) 46(D1):D633-D639. doi: 10.1093/nar/gkx935.
- 632 32. Faith DP. Conservation evaluation and phylogenetic diversity. *Biol. Conserv*  
633 (1992) 61, 1–10. doi: 10.1016/0006-3207(92)91201-3
- 634 33. Pielou EC. The measurement of diversity in different types of biological  
635 collections. *J. Theor. Biol* (1966) 13, 131–144. doi: 10.1016/0022-5193(66)90013-0

- 636 34. Bray JR, Curtis JT. An Ordination of the Upland Forest Communities of Southern  
637 Wisconsin. *Ecol Monogr* (1957) 27:325–49. doi: 10.2307/1942268
- 638 35. Love MI, Huber W, Anders S. Moderated estimation of fold change and  
639 dispersion for RNA-seq data with DESeq2. *Genome Biol* (2014) 15(12):550. doi:  
640 10.1186/s13059-014-0550-8.
- 641 36. Wu-Chuang A, Hodžić A, Mateos-Hernández L, Estrada-Peña A, Obregon D, and  
642 Cabezas-Cruz A. Current debates and advances in tick microbiome research.  
643 CRPVBD. Submitted.
- 644 37. Clayton KA, Gall CA, Mason KL, Scoles GA, and Brayton KA. The  
645 characterization and manipulation of the bacterial microbiome of the Rocky Mountain  
646 wood tick, *Dermacentor andersoni*. *Parasit Vectors* (2015) 8:632. doi:  
647 10.1186/s13071-015-1245-z.
- 648 38. Zhang CM, Li NX, Zhang TT, Qiu ZX, Li Y, Li LW, et al. Endosymbiont CLS-  
649 HI plays a role in reproduction and development of *Haemaphysalis longicornis*. *Exp*  
650 *Appl Acarol* (2017) 73(3-4):429-38. doi: 10.1007/s10493-017-0194-y.
- 651 39. Ben-Yosef M, Rot A, Mahagna M, Kapri E, Behar A, and Gottlieb Y. Coxiella-  
652 Like Endosymbiont of *Rhipicephalus sanguineus* Is Required for Physiological  
653 Processes During Ontogeny. *Front Microbiol* (2020) 11:493. doi:  
654 10.3389/fmicb.2020.00493.
- 655 40. Ben-Yakir D, Fox CJ, Homer JT, and Barker RW. Quantification of host  
656 immunoglobulin in the hemolymph of ticks. *J Parasitol* (1987) 73(3): 669-71.
- 657 41. Ackerman S, Clare FB, McGill TW, and Sonenshine DE. Passage of host serum  
658 components, including antibody, across the digestive tract of *Dermacentor variabilis*  
659 (Say). *J Parasitol* (1981) 67(5):737-40.
- 660 42. Wang H, and Nuttall PA. Excretion of host immunoglobulin in tick saliva and  
661 detection of IgG-binding proteins in tick haemolymph and salivary glands.  
662 *Parasitology* (1994) 109 ( Pt 4):525-30. doi: 10.1017/s0031182000080781.
- 663 43. Willadsen P. Novel vaccines for ectoparasites. *Vet Parasitol* (1997) 71(2-3):209-  
664 22. doi: 10.1016/s0304-4017(97)00028-9.
- 665 44. Rathinavelu S, Broadwater A, and de Silva AM. Does host complement kill  
666 *Borrelia burgdorferi* within ticks?. *Infect Immun* (2003) 71(2):822-9. doi:  
667 10.1128/iai.71.2.822-829.2003.
- 668 45. Galay RL, Matsuo T, Hernandez EP, Talactac MR, Kusakisako K, Umemiya-  
669 Shirafuji R, et al. Immunofluorescent detection in the ovary of host antibodies against

- 670 a secretory ferritin injected into female *Haemaphysalis longicornis* ticks. *Parasitol Int*  
671 (2018) 67(2):119-22. doi: 10.1016/j.parint.2017.10.006.
- 672 46. Gough JM, and Kemp DH. Localization of a low abundance membrane protein  
673 (Bm86) on the gut cells of the cattle tick *Boophilus microplus* by immunogold  
674 labeling. *J Parasitol* (1993) 79(6):900-7.
- 675 47. Popara M, Villar M, Mateos-Hernández L, de Mera IG, Marina A, del Valle M, et  
676 al. Lesser protein degradation machinery correlates with higher BM86 tick vaccine  
677 efficacy in *Rhipicephalus annulatus* when compared to *Rhipicephalus microplus*.  
678 *Vaccine* (2013) 31(42):4728-35. doi: 10.1016/j.vaccine.2013.08.031.
- 679 48. Stachowicz JJ and Hay ME. Mutualism and coral persistence: The role of  
680 herbivore resistance to algal chemical defense. *Ecology* (1999) 80(6):2085–101.  
681 doi.org/10.2307/176680
- 682 49. Witman JD. Subtidal Coexistence: Storms, Grazing, Mutualism, and the Zonation  
683 of Kelps and Mussels. *Ecol Monogr* (1987) 57(2):167–87.
- 684 50. Banerjee S, Schlaeppi K, and van der Heijden MGA. Keystone taxa as drivers of  
685 microbiome structure and functioning. *Nat Rev Microbiol* (2018) 16(9):567-76. doi:  
686 10.1038/s41579-018-0024-1.
- 687 51. Jordán F. Keystone species and food webs. *Philos Trans R Soc Lond B Biol Sci*  
688 (2009) 364(1524):1733-41. doi: 10.1098/rstb.2008.0335
- 689 52. Hooks KB, and O'Malley MA. Dysbiosis and Its Discontents. *mBio* (2017)  
690 8(5):e01492-17. doi: 10.1128/mBio.01492-17.
- 691 53. Gutiérrez N, and Garrido D. Species Deletions from Microbiome Consortia  
692 Reveal Key Metabolic Interactions between Gut Microbes. *mSystems* (2019)  
693 16;4(4):e00185-19. doi: 10.1128/mSystems.00185-19.
- 694 54. Cabezas-Cruz A, Espinosa PJ, Obregón D, Alberdi P, de la Fuente J. *Ixodes*  
695 *scapularis* tick cells control *Anaplasma phagocytophilum* infection by increasing the  
696 synthesis of phosphoenolpyruvate from tyrosine. *Front Cell Infect Microbiol* (2017)  
697 7:375. doi: 10.3389/fcimb.2017.00375.



698 **Figure legends**

699

700 **Figure 1. Performance of *I. ricinus* nymphs feeding on mice vaccinated with live *E.***

701 ***coli* or *L. mesenteroides*.** (A) The weight of individual engorged ticks was measured  
702 and compared between groups. (B) The percentage of ticks that engorged and dropped  
703 was calculated and compared between groups. (C) The percentage of dead ticks was  
704 calculated and tick mortality (%) was compared between groups. Means and standard  
705 deviation values are displayed. The parameters were compared between groups by the  
706 Mann-Whitney U test. (ns-not significant; n = 12 mice (n = 20 ticks per mouse)

707

708 **Figure 2. Impact of anti-microbiota vaccines on tick microbial diversity and**

709 **evenness.** (A) Faith's phylogenetic diversity and (B) Pielou's evenness indexes were  
710 used to calculate the microbial richness and evenness, respectively, of the bacterial  
711 communities of unfed ticks and ticks fed on mock-immunized (green, PBS), *E. coli*-  
712 immunized (red) and *L. mesenteroides*-immunized (blue) mice. (C) First axis PCoA plot  
713 showing the variance of taxonomical profile (Bry Curtis distance) at the level of genera  
714 between samples according to tick feeding status and feeding on immunized mice  
715 (PERMANOVA,  $p = 0.00$ ), arbitrary ellipses were drawn to facilitate the interpretation  
716 of the figure.

717

718 **Figure 3. Impact of anti-microbiota vaccines on the taxonomic profiles of tick**

719 **microbiome.** Volcano plot showing differential bacterial abundance in ticks of the  
720 different groups: (A) unfed ticks vs. ticks fed on mock-immunized mice (PBS), (B)  
721 ticks fed on mock-immunized vs. *L. mesenteroides*-immunized mice, and (C) ticks fed  
722 on mock-immunized vs. *E. coli*-immunized mice. The yellow (unfed ticks), blue (ticks  
723 fed on *L. mesenteroides*-immunized mice), and red (ticks fed on *E. coli*-immunized  
724 mice) dots indicate taxa that displayed both large magnitude fold-changes and high  
725 statistical significance favoring disturbed or control group (green dots), while the gray  
726 dots are considered as not significantly different between groups. The relative  
727 abundance (calculated as clr transformed values) of the 20 top bacterial taxa with the  
728 highest significant differences on ticks fed on mock-immunized vs. *L. mesenteroides*-  
729 immunized mice (D) and on ticks fed on mock-immunized vs. *E. coli*-immunized mice  
730 (E), as detected by the DeSeq2 algorithm (Wald test,  $p < 0.001$ ).

731

732 **Figure 4. Antibody response of mice vaccinated with live *E. coli* or *L.***  
733 ***mesenteroides*.** The levels of IgM and IgG specific to (A) *E. coli* and (A) *L.*  
734 *mesenteroides* proteins were measured by semi-quantitative ELISA in sera of mice  
735 immunized with *E. coli* (red) and *L. mesenteroides* (blue), respectively, at different time  
736 points (days, d), d0, d14, d30 and d46. Antibody levels of bacteria-immunized mice  
737 were compared with those of mock-immunized (green, PBS) mice. Means and standard  
738 error values are shown. Results were compared by two-way ANOVA with Bonferroni  
739 test applied for comparisons between control and immunized mice. (\*  $p < 0.05$ , \*\*\*  $p <$   
740  $0.0001$ ; ns-not significant; 1 experiment,  $n = 12$  mice and three technical replicates per  
741 sample.

742

743 **Figure 5. Local connectivity of *Leuconostoc* and *Escherichia-Shigella* in the co-**  
744 **occurrence networks.** The nodes/taxa linked to *Leuconostoc* (cyan node, A, C) and  
745 *Escherichia-Shigella* (red node, B, D) were identified in the bacterial co- occurrence  
746 networks of ticks fed on mock-immunized (A, B), *L. mesenteroides*-immunized (C) and  
747 *E. coli*-immunized (D) mice. Connecting edges with positive and negative interactions  
748 were also identified.

749

750 **Figure 6. Network tolerance to node removal.** The resistance of the networks to  
751 directed (blue line), or random (orange line), removal of nodes was measured. The  
752 proportion of directly (red dashed line), or randomly (violet dashed line) removed nodes  
753 that made the network losing 0.90 of connectivity was recorded in the bacterial co-  
754 occurrence networks of ticks fed on mock-immunized (A), *L. mesenteroides*-immunized  
755 (B) and *E. coli*-immunized (C). Loss of connectivity values range between 0 (maximum  
756 of connectivity between nodes) and 1 (total disconnection between nodes) for any given  
757 network.

758

759 **Figure 7. Impact of anti-microbiota vaccines on the predicted functional profiles of**  
760 **tick microbiome.** Volcano plot showing differential enzyme (A-C) and pathway (D-F)  
761 abundance in ticks of the different groups: (A and D) unfed ticks vs. ticks fed on mock-  
762 immunized mice (PBS), (B and E) ticks fed on mock-immunized vs. *L. mesenteroides*-  
763 immunized mice, and (C and F) ticks fed on mock-immunized vs. *E. coli*-immunized  
764 mice. The yellow (unfed ticks), blue (ticks fed on *L. mesenteroides*-immunized mice),  
765 and red (ticks fed on *E. coli*-immunized mice) dots indicate enzyme (A-C) and pathway

766 (D-F) that displayed both large magnitude fold-changes and high statistical significance  
767 favoring disturbed or control PBS group (green dots), while the gray dots are considered  
768 as not significant. Differential features were detected by the DeSeq2 algorithm (Wald  
769 test,  $p < 0.05$ ).

770

771 **Figure 8. Differential predicted pathways influenced by feeding and anti-**  
772 **microbiota vaccines.** Venn diagram showing the common and different predicted  
773 bacterial pathways modulated by feeding (unfed ticks vs. ticks fed on mock-immunized  
774 mice), and anti-microbiota vaccination in ticks fed on mock-immunized vs. *L.*  
775 *mesenteroides*-immunized mice, and ticks fed on mock-immunized vs. *E. coli*-  
776 immunized mice. Only pathways with statistically significant log<sub>2</sub> fold changes of  
777 absolute value cutoff of 1 were considered.

778

#### 779 **Supplementary materials**

780

781 **Supplementary Figure S1. Immunocytochemistry of *E. coli* and *L. mesenteroides***  
782 **using sera of immunized mice.** Fixed *E. coli* (A,B) and *L. mesenteroides* (C,D) were  
783 stained with pooled sera of mice immunized with a live *E. coli* vaccine (*Escherichia*),  
784 live *L. mesenteroides* vaccine (*Leuconostoc*) or mock vaccine (PBS). Examples of  
785 positive reaction are displayed (white arrows in inserts). Alexa fluor 488 conjugated  
786 anti-mouse antibody specific to the isotypes IgM (A,C) and IgG (B,D) were used as a  
787 secondary antibody. Negative control staining (Control) was performed using only the  
788 secondary antibody. Blue color indicates the nuclei visualized by 4',6-diamidino-2-  
789 phenylindole (DAPI). Images were obtained using 63X magnification and digital zoom.  
790 Scale bars are 2µm.

791 **Supplementary Figure S2. Antibody response of mice vaccinated with live *E. coli***  
792 **or *L. mesenteroides*.** The levels of IgM and IgG specific to (A) *E. coli* and (B) *L.*  
793 *mesenteroides* proteins were measured by semi-quantitative ELISA in sera of mice  
794 immunized with *L. mesenteroides* (blue) and *E. coli* (red), respectively, at different time  
795 points, d0, d14, d30 and d46. Antibody levels of bacteria-immunized mice were  
796 compared with those of mock-immunized (green, PBS) mice. Means and standard error  
797 values are shown. Results were compared by two-way ANOVA with Bonferroni test  
798 applied for comparisons between control and immunized mice. (\*  $p < 0.05$ , \*\*  $p <$

799 0.001, \*\*\*  $p < 0.0001$ ; ns-not significant; 1 experiment, n = 12 mice and three technical  
800 replicates per sample.

801 **Supplementary Figure S3.** A schematic representation of the co-occurring microbial  
802 taxa in the microbiome of ticks fed on mock-immunized (A), *L. mesenteroides*-  
803 immunized (B) and *E. coli*-immunized (C) mice. Circles (nodes) are bacterial genera  
804 and edges the co-occurrence between taxa. Equal colors mean clusters of taxa that co-  
805 occur more frequently among them than with other taxa. The size of the circles is  
806 proportional to the eigencentrality of each taxon in the resulting network. The nodes  
807 *Escherichia-Shigella* (red) and *Leuconostoc* (cyan) were identified and labelled  
808 (lighting symbol).

809 **Supplementary Table S1.** Pathways with differential abundance in the ticks that fed on  
810 mock-immunized mice compared to unfed ticks.

811 **Supplementary Table S2.** Pathways with differential abundance in the ticks that fed on  
812 *L. mesenteroides*-immunized compared to mock-immunized mice.

813 **Supplementary Table S3.** Pathways with differential abundance in the ticks that fed on  
814 *E. coli*-immunized compared to mock-immunized mice.

815

## 816 Tables

817 **Table 1.** Topological parameters of co-occurrence networks.

| Network features               | Control (PBS) | Vaccinated with<br><i>L. mesenteroides</i> | Vaccinated<br>with <i>E. coli</i> |
|--------------------------------|---------------|--------------------------------------------|-----------------------------------|
| Nodes                          | 525           | 503                                        | 518                               |
| Edges                          | 2930          | 7098                                       | 910                               |
| Positive                       | 2159 (73.7%)  | 3862 (55.5%)                               | 723 (79.4%)                       |
| Negative                       | 771 (26.3%)   | 3228 (45.5%)                               | 187 (20.6%)                       |
| Network Diameter               | 9             | 7                                          | 10                                |
| Average degree                 | 11.2          | 28.3                                       | 8.4                               |
| Weighted degree                | 4.4           | 2.2                                        | 1.7                               |
| Average path length            | 3.4           | 2.8                                        | 3.9                               |
| Modularity                     | 1.1           | 4.9                                        | 0.9                               |
| Number of modules              | 22            | 49                                         | 33                                |
| Average clustering coefficient | 0.6           | 0.6                                        | 0.5                               |

818

819

**A**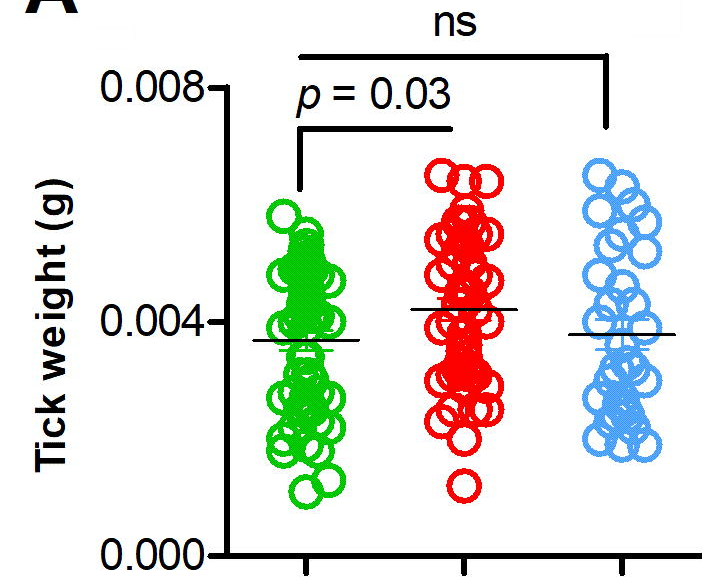**B**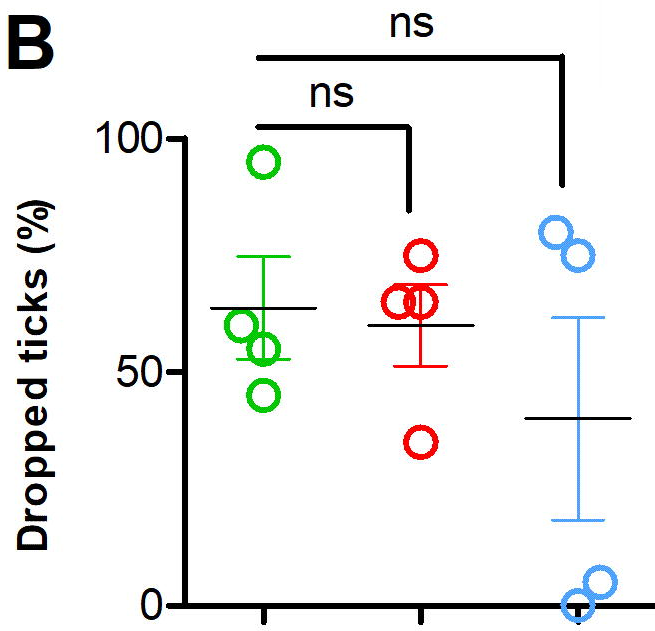**C**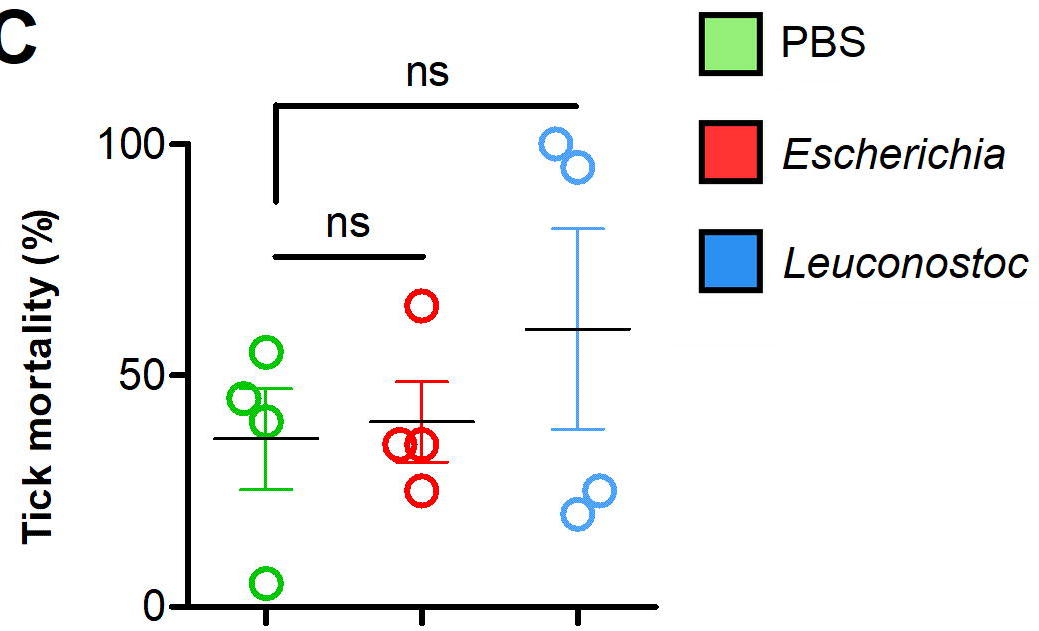

**A**  
Faith's phylogenetic diversity index

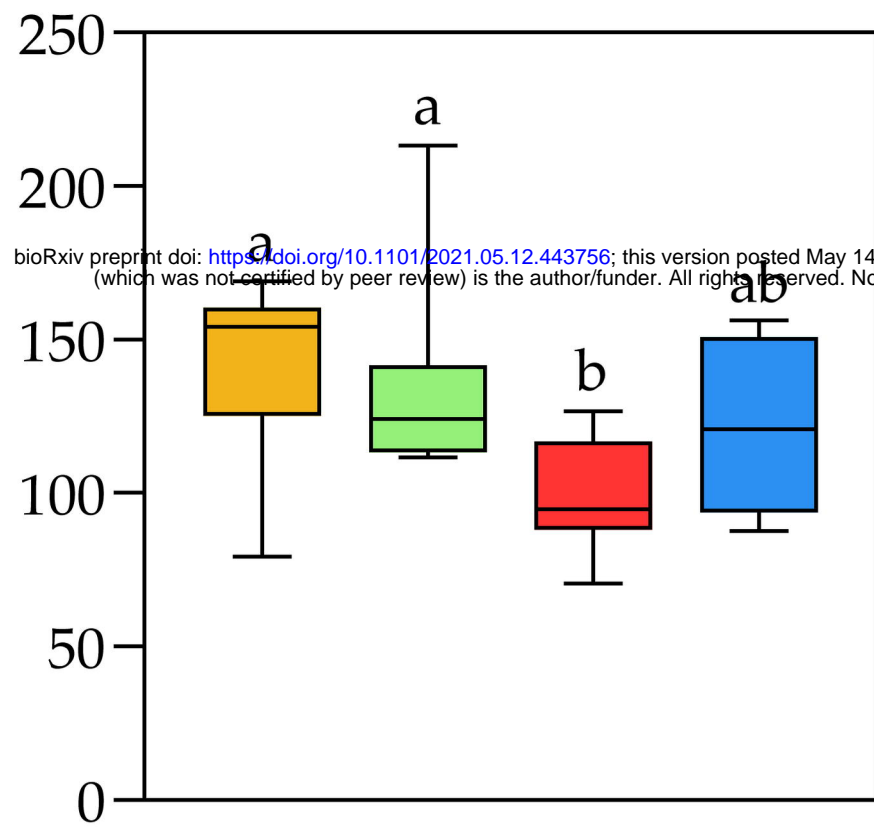

**B**

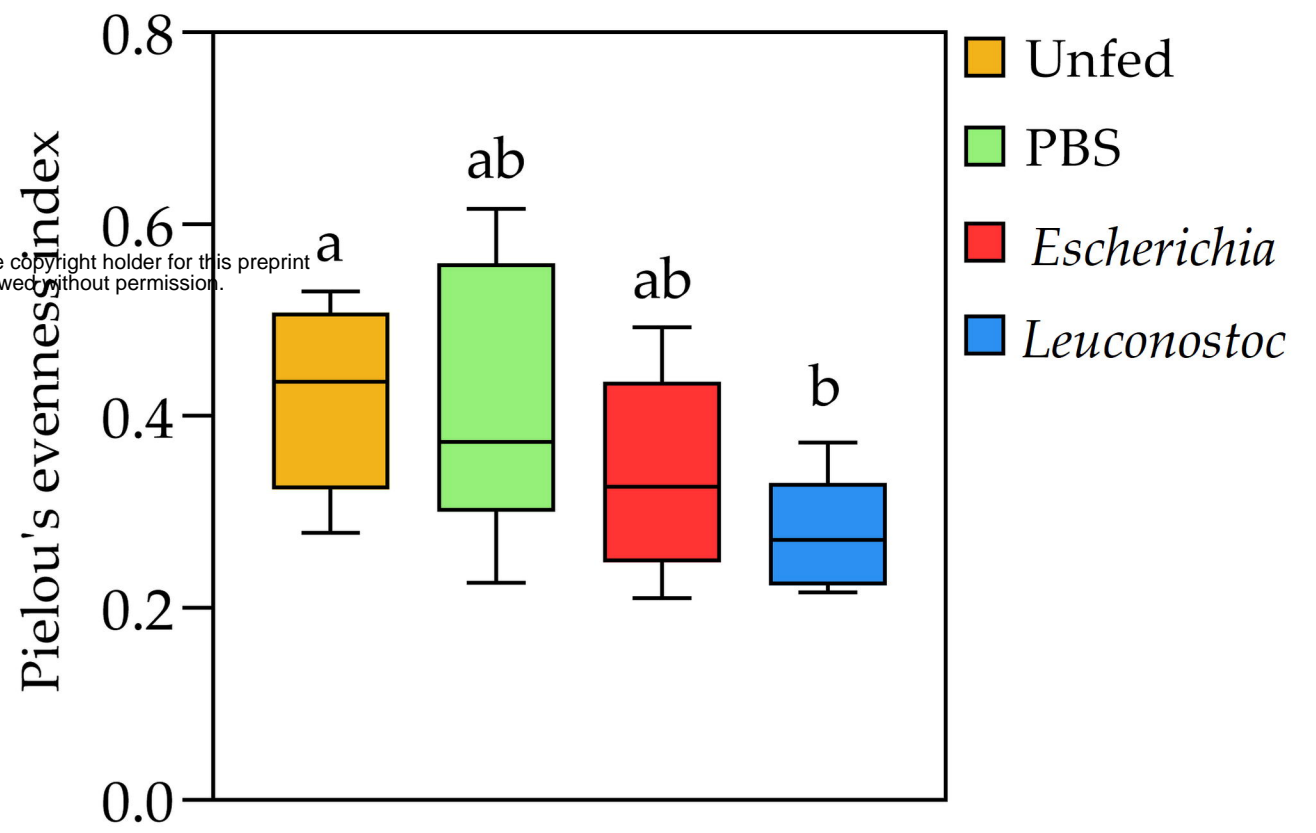

**C**

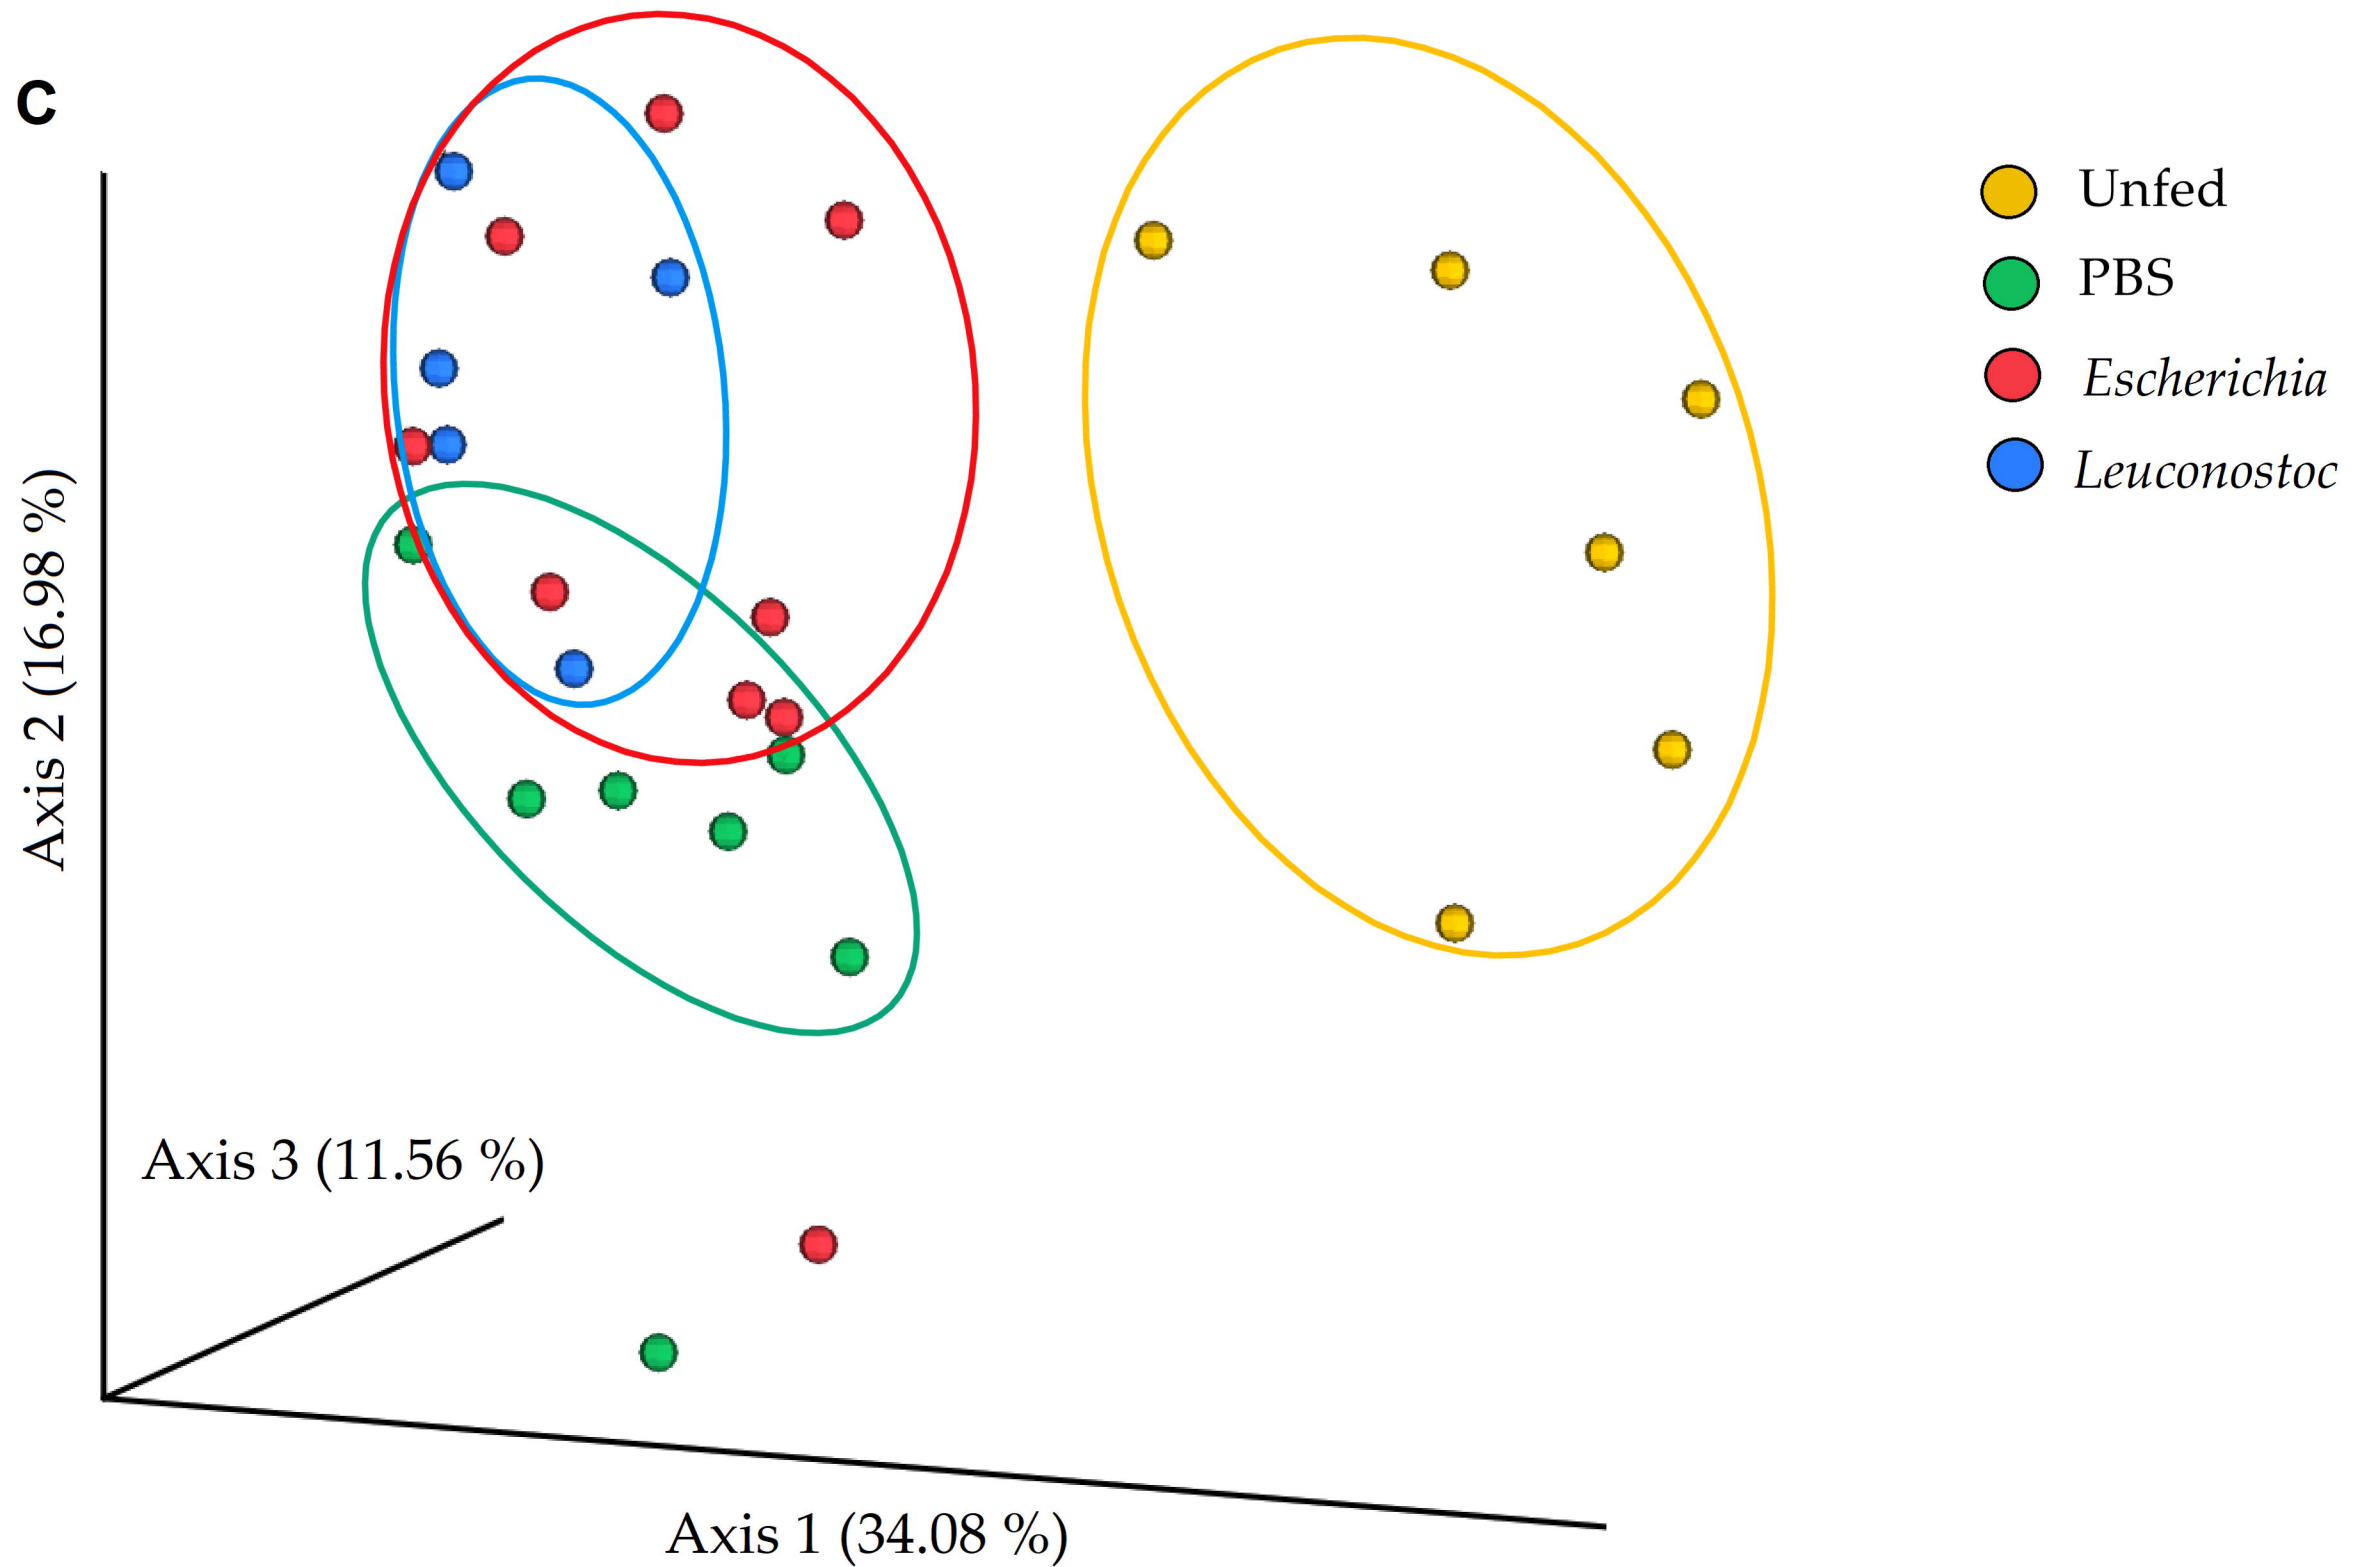

**A**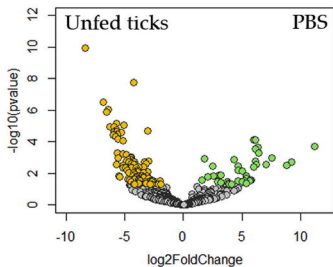**B**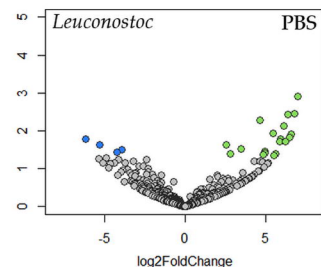**C**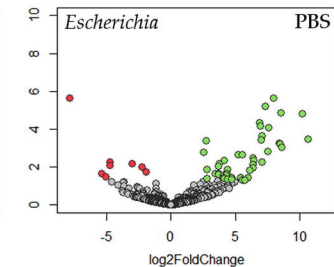**D**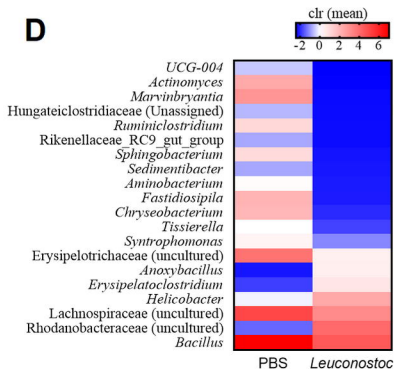**E**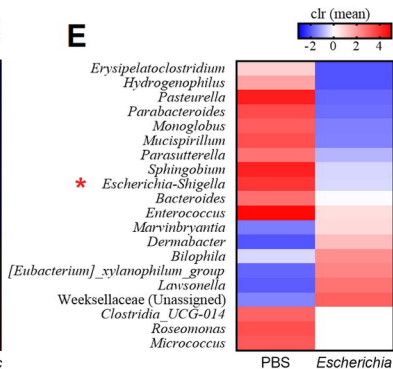



**A**Anti-*E. coli* IgM  
levels (OD)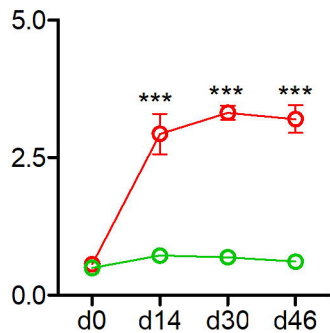Anti-*E. coli* IgG  
levels (OD)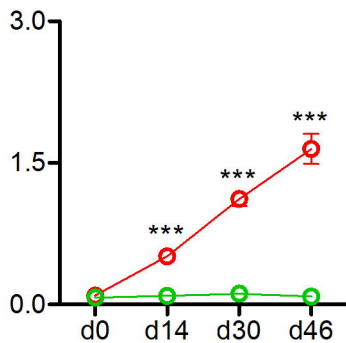**B**Anti-*L. mesenteroides*  
IgM levels (OD)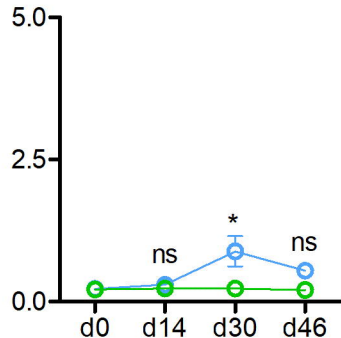Anti-*L. mesenteroides*  
IgG levels (OD)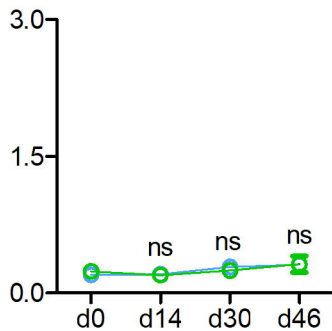

**A**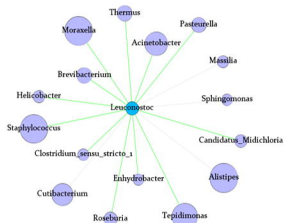**B**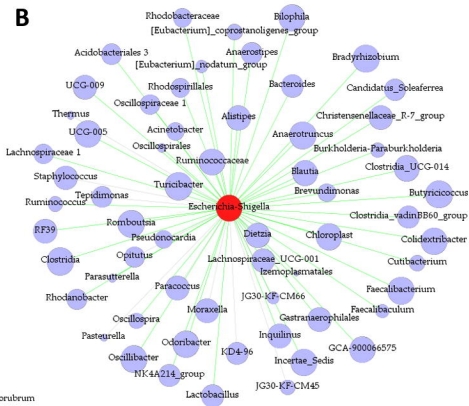**C**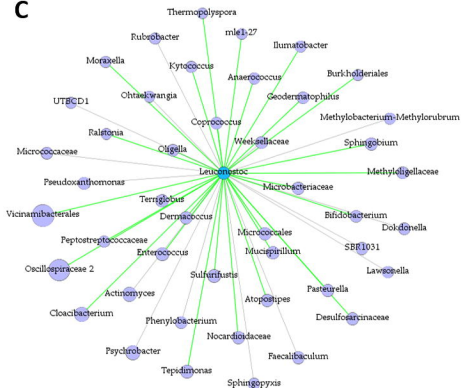**D**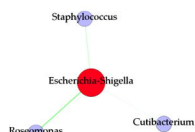**Node (genera)**● *Leuconostoc*● *Escherichia-Shigella*

● Other

**Connecting edge**

— Positive interaction

— Negative interaction

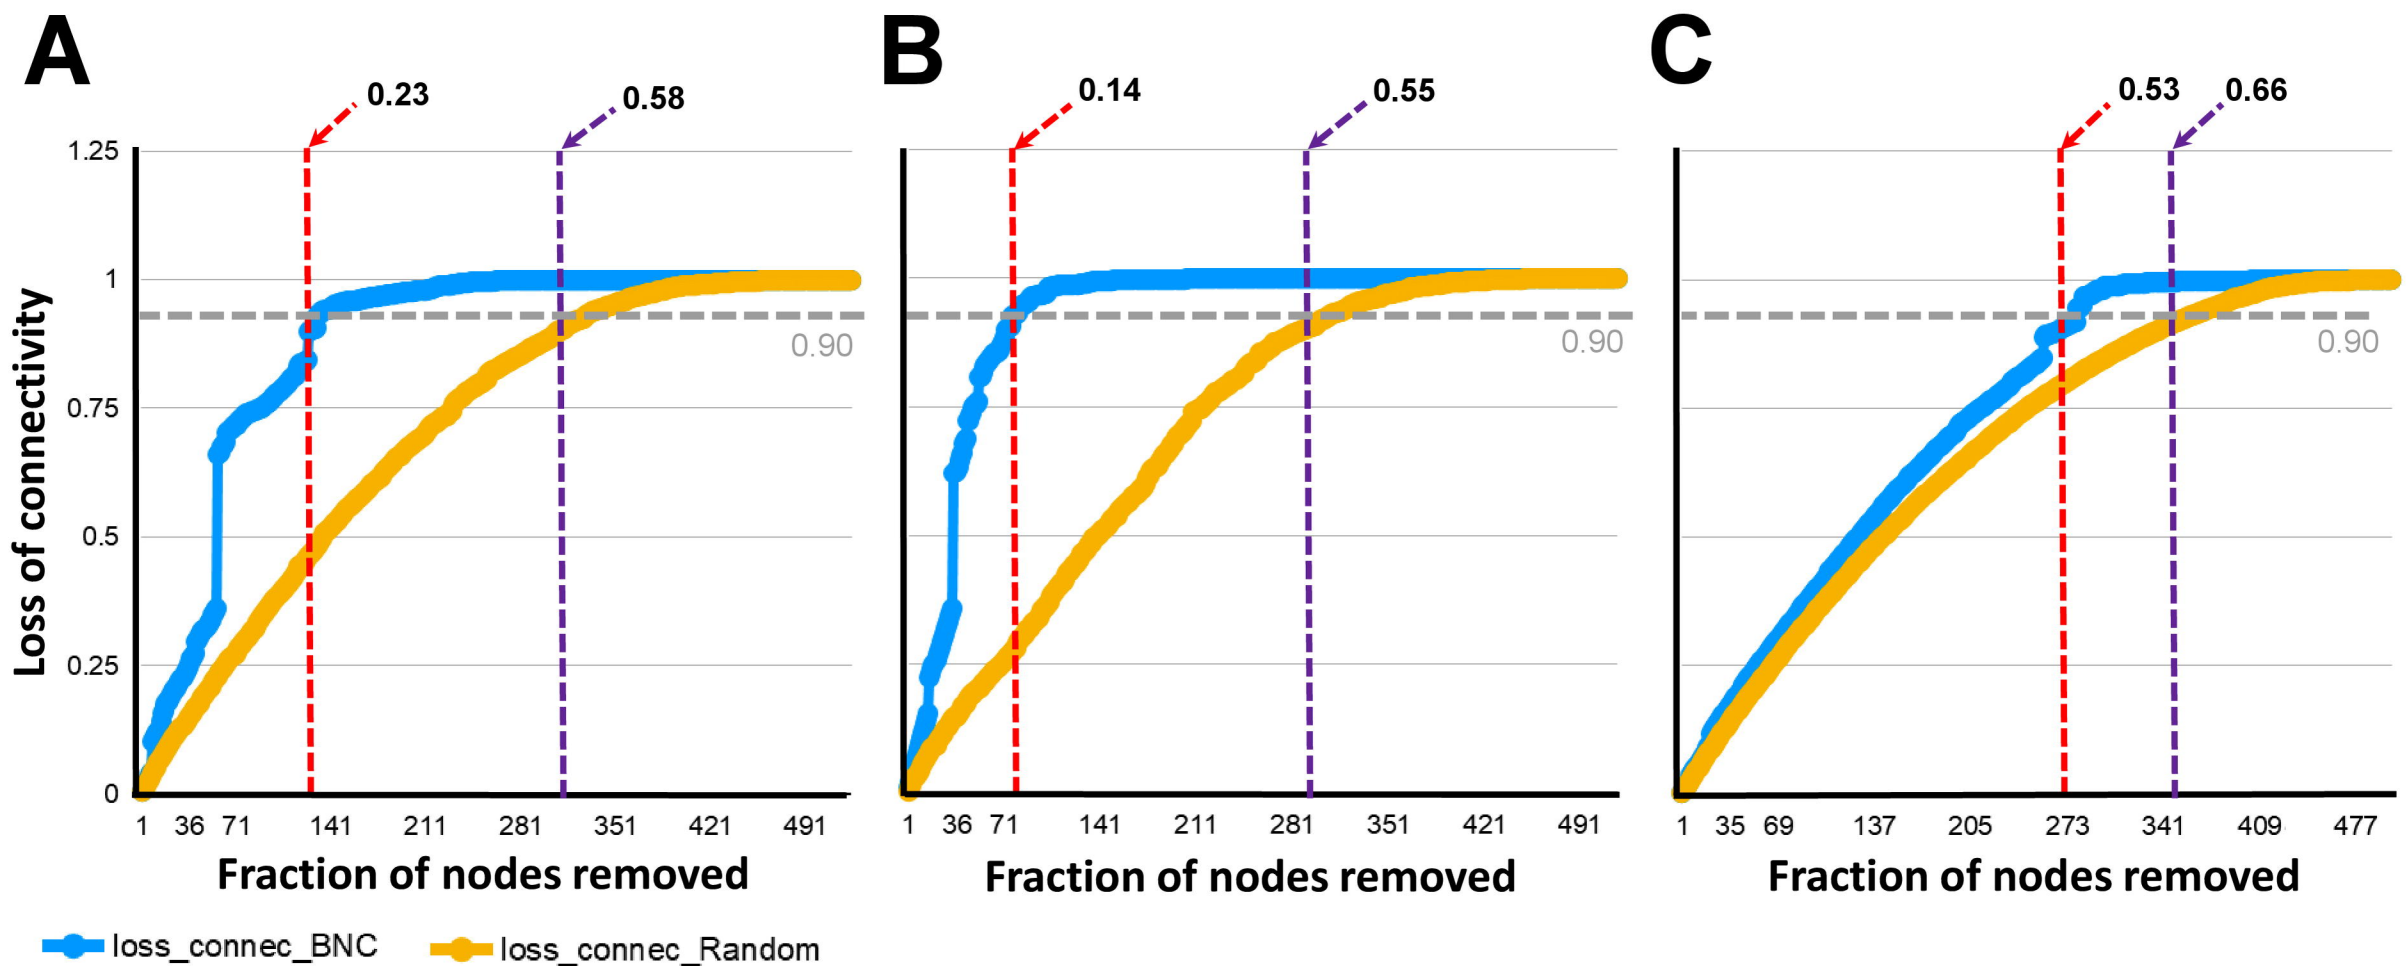

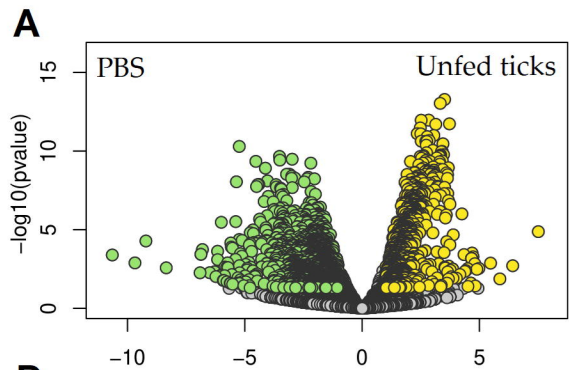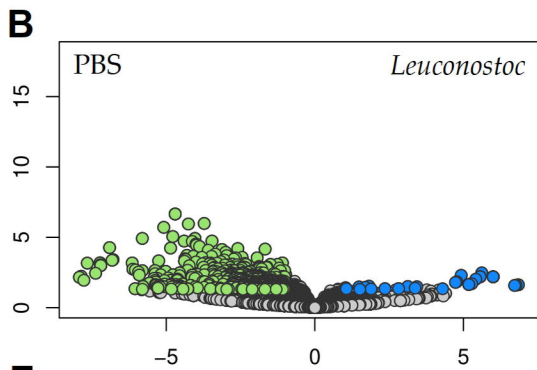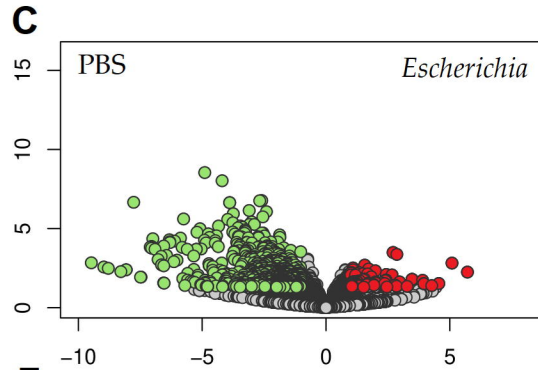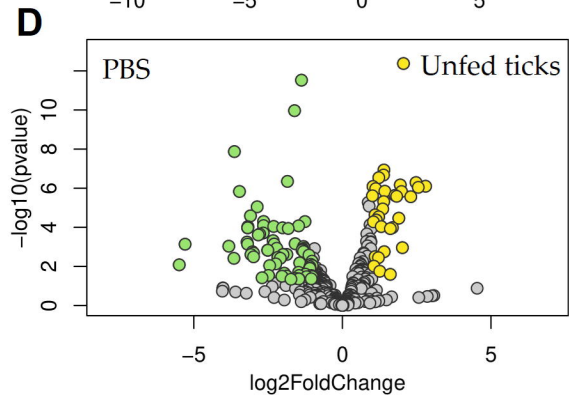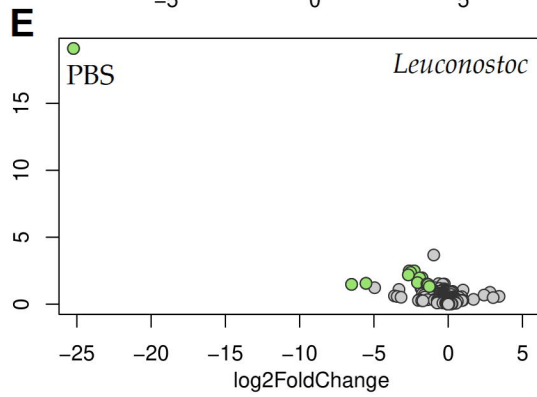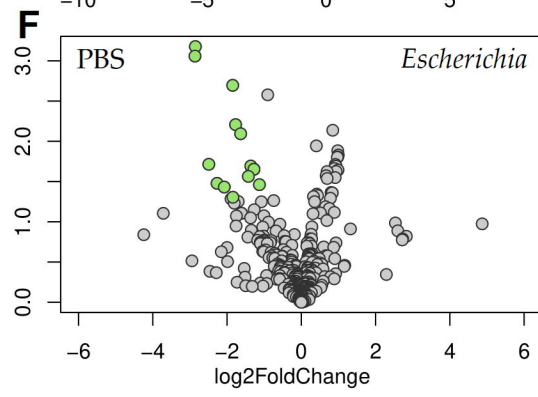

PBS vs Unfed

*E. coli* vs PBS

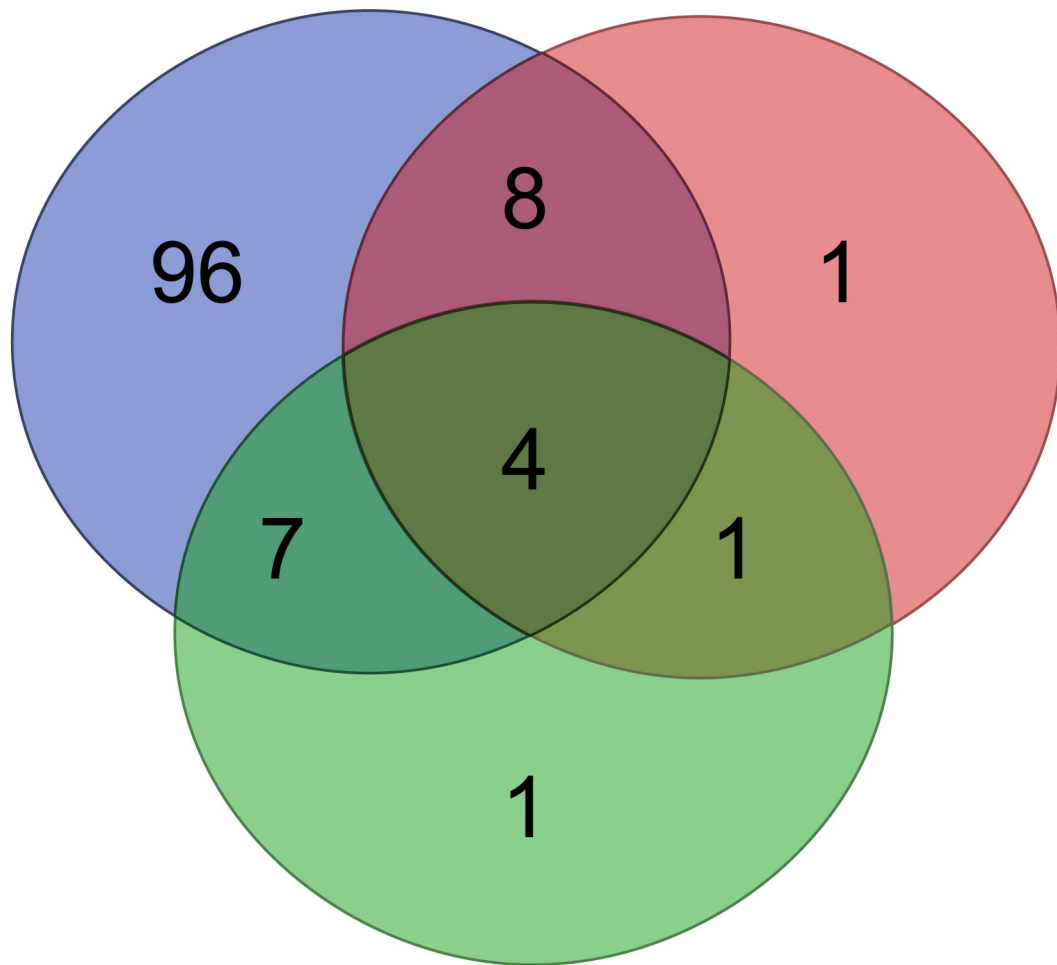

*L. mesenteroides* vs PBS
